# Supplementary material for: Sexual minority status and suicidal behaviour among Chinese adolescents: a nationally representative cross-sectional study
Source: PubMed Central journal article supplement — BMJ Open. 2018 Aug 8;8(8):e020969. doi: 10.1136/bmjopen-2017-020969 (PMC6089305; doi:10.1136/bmjopen-2017-020969), 2018-08-08
Supplement: bmjopen-2017-020969.draft_revisions.pdf [file bmjopen-2017-020969.draft_revisions.pdf]

# BMJ Open

BMJ Open is committed to open peer review. As part of this commitment we make the peer review history of every article we publish publicly available.

When an article is published we post the peer reviewers' comments and the authors' responses online. We also post the versions of the paper that were used during peer review. These are the versions that the peer review comments apply to.

The versions of the paper that follow are the versions that were submitted during the peer review process. They are not the versions of record or the final published versions. They should not be cited or distributed as the published version of this manuscript.

BMJ Open is an open access journal and the full, final, typeset and author-corrected version of record of the manuscript is available on our site with no access controls, subscription charges or pay-per-view fees (<http://bmjopen.bmj.com>).

If you have any questions on BMJ Open's open peer review process please email [info.bmjopen@bmj.com](mailto:info.bmjopen@bmj.com)

# BMJ Open

## Sexual minority status and suicidal behavior among Chinese adolescents: Findings from a nationally representative sample

|                                 |                                                                                                                                                                                                                                                                                                                                                                                                                                                                                                                                                                                                         |
|---------------------------------|---------------------------------------------------------------------------------------------------------------------------------------------------------------------------------------------------------------------------------------------------------------------------------------------------------------------------------------------------------------------------------------------------------------------------------------------------------------------------------------------------------------------------------------------------------------------------------------------------------|
| Journal:                        | <i>BMJ Open</i>                                                                                                                                                                                                                                                                                                                                                                                                                                                                                                                                                                                         |
| Manuscript ID                   | bmjopen-2017-020969                                                                                                                                                                                                                                                                                                                                                                                                                                                                                                                                                                                     |
| Article Type:                   | Research                                                                                                                                                                                                                                                                                                                                                                                                                                                                                                                                                                                                |
| Date Submitted by the Author:   | 05-Dec-2017                                                                                                                                                                                                                                                                                                                                                                                                                                                                                                                                                                                             |
| Complete List of Authors:       | huang, yeen; School of Public Health, Sun Yat-sen University, Department of Medical Statistics and Epidemiology<br>Li, Pengsheng; School of Public Health, Sun Yat-sen University, Department of Medical Statistics and Epidemiology<br>Lan, Guo; Sun Yat-sen University, School of Public Health<br>Xue, Gao; Center for ADR Monitoring of Guangdong<br>Xu, Yan; Center for ADR Monitoring of Guangdong<br>Huang, Guoliang; Center for ADR Monitoring of Guangdong<br>Xueqing, Deng; School of Public Health, Sun Yat-sen University<br>Lu, CiYong; Department of medical statistics and epidemiology, |
| <b>Primary Subject Heading</b>: | Public health                                                                                                                                                                                                                                                                                                                                                                                                                                                                                                                                                                                           |
| Secondary Subject Heading:      | Epidemiology, Mental health                                                                                                                                                                                                                                                                                                                                                                                                                                                                                                                                                                             |
| Keywords:                       | EPIDEMIOLOGY, MENTAL HEALTH, PAEDIATRICS, PSYCHIATRY, PUBLIC HEALTH, SEXUAL MEDICINE                                                                                                                                                                                                                                                                                                                                                                                                                                                                                                                    |
|                                 |                                                                                                                                                                                                                                                                                                                                                                                                                                                                                                                                                                                                         |

SCHOLARONE™  
Manuscripts

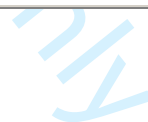

1  
2  
3 **Sexual minority status and suicidal behavior among Chinese adolescents:**  
4 **Findings from a nationally representative sample**  
5

6 Yeen Huang<sup>a#</sup>, MD, Pengsheng Li<sup>a#</sup>, MD, Lan Guo<sup>a</sup>, MD, Xue Gao<sup>b</sup>, MD, Yan Xu<sup>b</sup>,  
7 MD, Guoliang Huang<sup>b</sup>, MS, Xueqing Deng<sup>a,c</sup>, MS, Ciyong Lu<sup>a,c</sup>, MD, PhD  
8  
9

10 **Affiliations:** <sup>a</sup> Department of Medical Statistics and Epidemiology, School of Public  
11 Health, Sun Yat-sen University, Guangzhou, China; <sup>b</sup> Center for ADR Monitoring of  
12 Guangdong, Guangzhou, China; <sup>c</sup> Guangdong Provincial Key Laboratory of Food,  
13 Nutrition and Health, Guangzhou, China  
14

15 <sup>#</sup> These authors contributed equally to this work.  
16

17 **Address correspondence to:** Ciyong Lu, Department of medical statistics and  
18 epidemiology, School of public health, Sun Yat-sen university, Guangzhou, China  
19 #74, Zhongshan Road 2, Guangzhou 510080, P.R China, E-mail address:  
20 luciyong@mail.sysu.edu.cn, (+86) 020-87332477  
21  
22

23  
24 **Abstract**

25 **Objectives:** Suicide problems among sexual minority adolescents have raised  
26 worldwide concern in recent decades, and previous Western studies have  
27 demonstrated that sexual minority status is associated with adolescent suicidality.  
28 However, whether this association exists in Chinese adolescents remains unknown.  
29 This study aimed to estimate the prevalence of suicidality and examine the association  
30 between sexual minority status and suicidal behavior among Chinese adolescents.  
31

32 **Design:** Cross-sectional survey.

33 **Setting:** A total of 506 high schools in seven provinces of China.

34 **Participants:** A total of 150,822 students in grades 7-12 completed the questionnaires,  
35 and 123,459 students who reported being aware of their sexual orientation were  
36 included.  
37

38 **Main outcome measures:** Suicidal ideation, suicide attempts and sexual attraction.

39 **Results:** Sexual minority adolescents reported higher rates of both suicidal ideation  
40 (35.22%) and suicide attempts (10.21%) than their heterosexual peers. The prevalence  
41 of suicidal ideation was more frequently reported in same-sex attraction females  
42 (30.40%) and both-sex attraction females (42.28%) than same-sex attraction males  
43 (21.59%) and both-sex attraction males (34.69%), respectively. For males and females,  
44 same-sex attraction and both-sex attraction adolescents were more likely to report  
45 suicidal ideation and suicide attempts than their heterosexual peers. Across all sexual  
46 minority statuses stratified by sex, both-sex attraction males reported the greatest odds  
47 for suicide attempts (OR=3.88, 95% CI: 2.87-5.24), and both-sex attraction females  
48 reported the greatest odds for suicidal ideation (OR=2.65, 95% CI: 2.45-2.87).  
49

50 **Conclusions:** Sexual minority is associated with a higher risk of suicidality among  
51 Chinese adolescents; both-sex attraction males and females were associated with an  
52 increased risk of suicidality than their same-sex attraction peers. Therefore, our  
53 findings emphasize the urgent need to develop targeted interventions to prevent and  
54  
55  
56  
57  
58  
59  
60

effectively address suicide-related problems among Chinese sexual minority adolescents.

#### **Strengths and limitations of this study:**

- Our study estimate the prevalence of suicidality and examine the association between sexual minority status and suicidal behavior among Chinese adolescents
- A large-scale, nationally representative sample rendered sufficient statistical power and conduct the between-groups analyses.
- Due to the cross-sectional design, no causal and temporal relationships could be observed between sexual minority status and suicidal behavior.
- Our study sample included only school students and did not include adolescents who dropped out of school or were absent from school on the day the survey was administered.

**Funding source:** This work was supported by the National Natural Science Foundation of China (Grant number 81673252) and the Natural Science Foundation of Guangdong Province, China (Grant number 2014A030313174).

**Conflicting interests:** The authors have no conflicts of interest relevant to this article to disclose.

**Ethics approval:** The study protocol was approved by the Institutional Review Board of Sun Yat-sen University, School of Public Health.

**Data sharing statement:** No additional data are available.

#### **Introduction**

Suicidal behavior, which includes suicidal ideation, suicide attempts, and completed suicide, has raised health concerns among sexual minority (i.e., gay, lesbian, and bisexual) adolescents in recent decades. Compared with their heterosexual peers, sexual minority adolescents have been identified in numerous studies as a high-risk group for suicidal behavior.<sup>1-4</sup> A previous finding in the Youth Risk Behavior Surveys (YRBSs) showed that approximately 42.8% and 29.4% of sexual minority adolescents reported having suicidal ideation and suicide attempts, respectively.<sup>5</sup> Studies of secondary school students in Europe reported a lifetime prevalence of 35.4% for

1  
2  
3 suicidal ideation and 15.4% for suicide attempts among sexual minorities.<sup>6</sup> Other  
4  
5 relevant studies, using data from a nationally representative survey, reported that both  
6  
7 male and female sexual minority adolescents were more likely to report suicidal  
8  
9 ideation and suicide attempts than their heterosexual peers.<sup>1,3</sup>  
10  
11 To date, most current related studies have been conducted in Western or developed  
12  
13 countries. China, being regarded as a country with a high suicide rate, accounts for 21%  
14  
15 of the world's population and 30-40% of the world's suicides,<sup>7</sup> and numerous studies  
16  
17 have reported the suicide risk in the Chinese general population.<sup>8-10</sup> Since Chinese  
18  
19 society was dominated by Confucian ideology, people were expected to derive their  
20  
21 identity from family roles and having children.<sup>11</sup> Sexual minority was a large  
22  
23 challenge to the Confucian Chinese culture (such as filial piety), and Chinese sexual  
24  
25 minorities were under greater stress than their counterparts in Western societies.  
26  
27 However, few studies have compared the suicide risk of heterosexual and sexual  
28  
29 minorities in a representative sample among Chinese adolescents. Previous studies  
30  
31 have mainly focused on Chinese man who have sex with men (MSM)<sup>12,13</sup> or sexual  
32  
33 minority in certain regions of China.<sup>14</sup> Nationally representative data regarding  
34  
35 suicide prevalence in Chinese sexual minority adolescents are limited. Whether sexual  
36  
37 minority status is independently associated with suicide risk among Chinese  
38  
39 adolescents remains unknown. Several studies from Western countries have indicated  
40  
41 that individuals with certain sexual minority statuses (such as bisexual identity) have  
42  
43 the highest levels of suicide risk across all sexual minority statuses,<sup>15,16</sup> and whether  
44  
45 there is an elevated risk of suicide among Chinese bisexual identity adolescents is  
46  
47  
48  
49  
50  
51  
52  
53  
54  
55  
56  
57  
58  
59  
60

1  
2  
3 unknown. Therefore, understanding the relationship between sexual minority status  
4  
5 and suicide risk may comprehensively reveal the prevalence of suicidal behavior  
6  
7 among Chinese sexual minorities, which will contribute to the detection of suicidal  
8  
9 behavior and provide effective suicide-related preventive interventions.  
10  
11

12  
13 We conducted this large-scale study to estimate the prevalence of suicidality among  
14  
15 Chinese sexual minority adolescents, to evaluate the associations of sexual minority  
16  
17 statuses with suicidal ideation and attempts, and to investigate whether these  
18  
19 associations vary in relation to various sexual minority statuses.  
20  
21  
22  
23  
24

## 25 **Methods**

### 26 *2.1 Study design and participants*

27  
28 We utilized data from the 2015 School-Based Chinese Adolescents Health Survey  
29  
30 (SCAHS),<sup>17, 18</sup> an ongoing, large-scale health-related behavior survey among Chinese  
31  
32 adolescents (grades 7-12). The SCAHS has been conducted every two years since  
33  
34 2007, and the 2015 survey was the most recent version conducted in seven Chinese  
35  
36 provinces.<sup>19</sup>  
37  
38  
39  
40  
41

42 In the 2015 SCAHS, students were selected by a 4-stage, stratified-cluster,  
43  
44 random-sampling method. In stage 1, all 34 province-level regions in China were  
45  
46 divided of China into four regional stratifications (East China, West China, South  
47  
48 China, and North China), and we then selected two representative provinces from  
49  
50 each regional stratification by simple randomization (only one province from East  
51  
52 China). In stage 2, cities in each representative province were divided into three  
53  
54  
55  
56  
57  
58  
59  
60

1  
2  
3 economic stratifications (high-level, middle-level, and low-level) by per capita GDP  
4 (Gross Domestic Product). Based on the proportions of these three types of cities, six  
5  
6 cities were randomly selected from each representative province. In stage 3, schools  
7  
8 were divided into three categories: junior high schools (i.e., grades 7-9), senior high  
9  
10 schools (i.e., grades 10-12), and vocational high schools (i.e., grades 7-12). Based on  
11  
12 the proportions of these three types of schools, four junior high schools, four senior  
13  
14 high schools, and four vocational high schools were randomly selected from each  
15  
16 representative city (506 schools agreed to participate in this study). In stage 4, two  
17  
18 classes were randomly selected from each grade within the selected schools, and all  
19  
20 available students in the selected classes were invited to participate in this study  
21  
22 voluntarily. In total, 150,822 students completed the questionnaires (response rate of  
23  
24 95.93%).  
25  
26  
27  
28  
29  
30  
31

32 It remains unclear whether “unsure” should be classified as sexual minorities, and the  
33  
34 “unsure” respondents may be quite different from other types of sexual minority  
35  
36 status respondents regarding suicidal behaviors.<sup>20</sup> Thus, for our study, students who  
37  
38 belonged to the “unsure” category were not included in the analysis. Therefore, a total  
39  
40 of 123,459 students were included in the analysis.  
41  
42  
43  
44

## 45 *2.2 Data collection*

46  
47 All students from the chosen classes were distributed a standardized self-administered  
48  
49 questionnaire on the survey day, and they answered it in the classroom during a  
50  
51 normal class period (40 or 45 minutes). To protect the privacy of the students, the  
52  
53 questionnaire was completed by each student participant anonymously without the  
54  
55  
56  
57  
58  
59  
60

1  
2  
3 presence of teachers or other school personnel (to avoid any potential information  
4  
5 bias). All data were collected from November 2014 to January 2015.  
6  
7

### 8 *2.3 Ethics statement*

9

10 This study was approved by the Sun Yat-Sen University School of Public Health  
11  
12 Institutional Review Board. Written informed consent was obtained from each  
13  
14 participating student who was at least 18 years old, and written informed consent was  
15  
16 obtained from one of the student's parents (or legal guardian) if the student was under  
17  
18 18 years old.  
19  
20  
21

### 22 *2.4 Measures*

23

#### 24 *2.4.1 Suicidal ideation and suicide attempts*

25  
26

27 Suicidal ideation was defined as responding "1 or more times" to the following  
28  
29 question: "During the past 12 months, how many times did you seriously consider  
30  
31 attempting suicide?" Suicide attempts were assessed by asking students to rate on a  
32  
33 scale of zero, once, or more: "During the past 12 months, how many times did you  
34  
35 actually attempt suicide?"<sup>21-23</sup>  
36  
37

#### 38 *2.4.2 Sexual minority status*

39  
40

41 Sexual minority was defined as persons who were sexually attracted to people of their  
42  
43 own sex; have sexual relations with people of their own sex; or identify as gay,  
44  
45 lesbian, bisexual, or queer. Individuals who occupied one or more identities were  
46  
47 defined as sexual minority status.<sup>24</sup> Sexual minority status was measured by asking  
48  
49 students the following question regarding sexual attraction: "In a romantic  
50  
51 relationship, which kind of person are you attracted to?" Response options included  
52  
53  
54  
55  
56  
57  
58  
59  
60



1  
2  
3 the following: (1) opposite sex, (2) same sex, (3) equally opposite and same sex, and  
4  
5 (4) unsure.<sup>25</sup> We used these questions and the sex of respondents to create the  
6  
7 following categories: (1) heterosexual, (2) same-sex attraction (SSA), (3) both-sex  
8  
9 attraction (BSA), and (4) unsure. Students who belonged to categories (2) and (3)  
10  
11 were classified as sexual minority.  
12  
13  
14

#### 15 16 *2.4.3 Demographic variables*

17  
18 Factors previously reported to be associated with suicidal behavior in sexual minority  
19  
20 adolescents were taken into consideration.<sup>1, 3, 26</sup> Demographic variables included sex,  
21  
22 age, bullying experience, academic pressure, household socioeconomic status (HSS),  
23  
24 current smoking, and current drinking.  
25  
26

27  
28 After reading a brief definition of bullying from the Olweus Bully/Victim  
29  
30 Questionnaire, adolescents were asked: “How often have you been bullied (kicked,  
31  
32 excluded intentionally from participating, made fun of with sexual jokes, etc.) at  
33  
34 school in the past 30 days?”<sup>27</sup> Answers were given on a 3-point scale as follows: (1)  
35  
36 never, (2) sometimes or rarely (one or two times), or (3) often (more than three times).  
37  
38 Students reporting a frequency of “often” in the past 30 days were classified as  
39  
40 bullied.<sup>28</sup> Academic pressure was assessed based on the student’s self-rating  
41  
42 concerning their school work; responses were coded as follows: (1) none, (2) less, or  
43  
44 (3) medium or great. HSS was measured by asking about the student’s perception of  
45  
46 his or her household’s current socioeconomic status; responses were coded as follows:  
47  
48 (1) very good, (2) good, and (3) fair or poor. Current smoking was measured by  
49  
50 asking the following question: “During the past 30 days, on how many days did you  
51  
52  
53  
54  
55  
56  
57  
58  
59  
60

1  
2  
3 smoke cigarettes?” Students who selected answers indicating 1 or more days were  
4  
5 classified as current smokers.<sup>29, 30</sup> Current drinking was assessed by the following  
6  
7 question: “During the past 30 days, on how many days did you drink alcohol?”  
8  
9

10 Students who selected answers indicating 1 or more days were classified as current  
11  
12 drinkers.<sup>31</sup>  
13

### 14 15 16 *2.5 Statistical analysis*

17  
18 Prevalence estimates and logistic regression analyses used appropriate sampling  
19  
20 weights (adjusting for student’s grade, student’s sex, and school location) and  
21  
22 estimation procedures that accounted for the complex sampling design. Taylor series  
23  
24 estimation methods were utilized to obtain proper standard error estimates. First,  
25  
26 descriptive analyses were conducted to describe the demographic characteristics and  
27  
28 prevalence of suicidality. Second, Rao-Scott Chi-square tests and one-way ANOVA  
29  
30 were used to compare the differences in demographic characteristics and suicide rates  
31  
32 between groups. Third, univariate logistic regression models were performed to  
33  
34 explore the associations between sexual minority status and suicidal ideation and  
35  
36 suicide attempts without the confounding effects of sex. Additional multivariate  
37  
38 models sequentially adjusted for age, bullying experience, academic pressure, HSS,  
39  
40 current smoking and current drinking. Based on previously reported studies,<sup>9, 10</sup> age,  
41  
42 school environment (e.g., bullying experience), socio-family environment (e.g.,  
43  
44 academic pressure and HSS), and unhealthy behaviors (e.g., smoking and drinking)  
45  
46 were associated with suicidal behaviors in China, and all were added as covariates to  
47  
48 determine the independent associations of sexual minority status related to suicidality.  
49  
50  
51  
52  
53  
54  
55  
56  
57  
58  
59  
60

OR (Odds ratios) and 95% CI (confidence intervals) were obtained from logistic regression models. *P*-values less than 0.05 were considered statistically significant (tested 2-sided) for regression analysis. The alpha level for paired comparison was set by the Bonferroni correction. All statistical analyses were conducted using SAS 9.4 (SAS Institute, Inc., Cary, NC, USA).

## Results

### 3.1 Demographic characteristics

Basic descriptive statistics are shown in **Table 1**. Of the total sample, 95.01% were heterosexual, and 4.99% were sexual minority. The mean (SE) age of the adolescents was 15.30 (0.49) years. More female students (58.63%) were reported as sexual minority than male students (41.37%), and a higher proportion of sexual minority (16.11%) students reported school bullying experiences during the past 30 days compared with their heterosexual peers (7.97%). Additionally, academic pressure, HSS, smoking and drinking between heterosexual and sexual minority adolescents were significantly different.

### 3.2 Prevalence of suicidality

As shown in **Table 1**, sexual minority students reported higher rates of both suicidal ideation and suicide attempts than heterosexual students. For male adolescents (**Table 2**), the weighted prevalence of suicidal ideation was more frequently reported in sexual minority (SSA: 21.59%; BSA: 34.69%) students than that in their heterosexual peers (14.50%). After paired comparison, BSA students reported the highest rate of

1  
2  
3 suicidal ideation among male adolescents. The weighted prevalence of admitting  
4  
5  
6 suicide attempts were higher in sexual minority adolescents (SSA: 6.91%; BSA:  
7  
8 12.18%) than that in their heterosexual peers (2.17%); however, no significant  
9  
10 differences were found between SSA and BSA students.  
11

12  
13 For female adolescents (**Table 2**), the weighted prevalence of suicidal ideation was  
14  
15 more frequently reported in sexual minority (SSA: 30.40%; BSA: 42.28%) students  
16  
17 than that in their heterosexual peers (18.85%). After paired comparison, BSA students  
18  
19 reported the highest rate of suicidal ideation among female adolescents. The weighted  
20  
21 prevalence of admitting suicide attempts were higher in sexual minority adolescents  
22  
23 (SSA: 8.92%; BSA: 10.86%) than that in their heterosexual peers (3.04%); however,  
24  
25  
26  
27 no significant differences were found between SSA and BSA students.  
28

29  
30 Among male and female adolescents, the weighted prevalence of suicidal ideation  
31  
32 was more frequently reported in SSA females (30.40%) and BSA females (42.28%)  
33  
34 than SSA males (21.59%) and BSA males (34.69%), respectively. However, there  
35  
36  
37 were no significant differences in the weighted prevalence of admitting suicide  
38  
39 attempts between SSA males and SSA females, and BSA males and BSA females,  
40  
41  
42 among male and female adolescents, respectively.  
43

### 44 45 *3.3 Associations between sexual minority status and suicidal ideation and suicide* 46 47 *attempts* 48

49  
50 As shown in **Table 3**, for male adolescents, unadjusted analyses (model 1) showed  
51  
52 that SSA and BSA were positively associated with suicidal ideation and suicide  
53  
54 attempts. Adjusting for bullying experience, academic pressure, HSS, current smoking,  
55  
56  
57  
58  
59

1  
2  
3 and current drinking attenuated OR estimates, and the differences remained  
4  
5 statistically significant (model 2). SSA (OR=1.57, 95% CI: 1.28-1.92) and BSA  
6  
7 (OR=2.43, 95% CI: 2.04-2.90) students were more likely to report suicidal ideation  
8  
9 than their heterosexual peers. Compared with heterosexual peers, SSA (OR=3.10, 95%  
10  
11 CI: 2.28-4.20) and BSA (OR=3.88, 95% CI: 2.87-5.24) males were significantly more  
12  
13 likely to report at least one suicide attempts. BSA males reported the greatest odds for  
14  
15 suicide attempts across all sexual minority statuses stratified by sex.  
16  
17

18  
19 For female adolescents, unadjusted analyses (model 1) showed that SSA and BSA  
20  
21 were positively associated with suicidal ideation and suicide attempts. Adjusting for  
22  
23 bullying experience, academic pressure, HSS, current smoking, and current drinking  
24  
25 attenuated OR estimates, and the differences remained statistically significant (model  
26  
27 2). SSA (OR=1.40, 95% CI: 1.28-1.54) and BSA (OR=2.65, 95% CI: 2.45-2.87)  
28  
29 females were more likely to report suicidal ideation than their heterosexual peers.  
30  
31 Compared with heterosexual students, SSA (OR=1.94, 95% CI: 1.43-2.63) and BSA  
32  
33 (OR=2.64, 95% CI: 2.22-3.14) females were significantly more likely to report at  
34  
35 least one suicide attempts. BSA females reported the greatest odds for suicidal  
36  
37 ideation across all sexual minority statuses stratified by sex.  
38  
39  
40  
41  
42  
43  
44  
45  
46  
47

## 48 **Discussion**

49  
50 Like many studies in Western countries, we determined that Chinese sexual minority  
51  
52 adolescents have a higher risk of suicidal ideation and suicide attempts than their  
53  
54 heterosexual peers; both-sex attraction males and females were associated with an  
55  
56  
57  
58  
59  
60

1  
2  
3 increased risk of suicidality. To our knowledge, this study is the first to utilize  
4  
5  
6 nationally representative data to explore the association between sexual minority  
7  
8 status and suicidal behavior among Chinese adolescents.  
9

10 Consistent with previous findings among Western adolescents,<sup>1-3</sup> our results  
11  
12 additionally revealed that sexual minority adolescents had a higher prevalence of both  
13  
14 suicidal ideation and suicide attempts than their heterosexual peers. Compared with a  
15  
16 community-based study conducted in sexual minority youths from three Asian cities  
17  
18 (Hanoi, Shanghai, and Taipei),<sup>14</sup> the prevalence of suicidality in our sexual minority  
19  
20 samples was similar to that in the Taipei samples; however, the prevalence of  
21  
22 suicidality in our sexual minority samples for suicidal ideation and suicide attempts  
23  
24 was higher than those in the Shanghai and Hanoi samples. The variation in results  
25  
26 may derive from the different sample sources and age structures. Our findings provide  
27  
28 population-based evidence of the prevalence of suicidal behavior among Chinese  
29  
30 sexual minorities, which is useful for identifying high-risk adolescents who may be at  
31  
32 risk of suicide.  
33  
34  
35  
36  
37  
38  
39

40 Furthermore, we found that, compared with their heterosexual peers, Chinese sexual  
41  
42 minority adolescents were associated with an increased risk of suicidality after  
43  
44 stratification by sex. To our knowledge, due to insufficient sample sizes, most  
45  
46 previous studies combined individuals of different sexual minority statuses into one  
47  
48 category without considering sex stratification, which may obscure the estimates of  
49  
50 suicide risk among high-risk adolescents.<sup>15, 32</sup> Our study is the first to utilize a large,  
51  
52  
53 nationally representative sample to explore the association between sexual minority  
54  
55  
56  
57  
58  
59  
60

1  
2  
3 status and suicidal behavior among Chinese adolescents grouped according to sexual  
4  
5  
6 minority status and stratified by sex. Our results are consistent with a previous  
7  
8 Australian national study that reported a higher risk of suicidal ideation and suicide  
9  
10 attempts among homosexual males and bisexual females.<sup>15</sup> Although the associations  
11  
12 of bisexual males with suicidal ideation and homosexual females with suicide  
13  
14 attempts were not statistically significant in their study, our results determined that  
15  
16 BSA males were associated with an increased risk of suicidal ideation, and SSA  
17  
18 females were associated with an increased risk of suicide attempts. The variation in  
19  
20 results may derive from the different population characteristics and measures of  
21  
22 sexual minority statuses. One possible mechanism to explain the association between  
23  
24 sexual minority status and suicide risk may be related to the experience of minority  
25  
26 stress.<sup>33</sup> According to the Minority Stress Model, sexual minority individuals may  
27  
28 experience minority stressors (e.g., prejudice events, internalized homophobia, etc.).  
29  
30 The experience of these stressors is related to lower well-being and higher levels of  
31  
32 suicidal ideation.<sup>34</sup> Previous results from a 2011 National School Climate Survey  
33  
34 indicated that over 60-80% of sexual minority students reported being verbally  
35  
36 harassed, and 40% of students experienced physical violence at school during the past  
37  
38 year.<sup>35</sup> Experiences such as being threatened or injured are directly related to  
39  
40 suicidality among sexual minority adolescents.<sup>36</sup> In current Chinese society, stigma  
41  
42 against non-heterosexual individuals persists, and a large portion of the general  
43  
44 population shows intolerant attitudes toward sexual minorities.<sup>37</sup> In our study, we  
45  
46 additionally found that Chinese sexual minorities have a higher prevalence of bullying  
47  
48  
49  
50  
51  
52  
53  
54  
55  
56  
57  
58  
59  
60

1  
2  
3 experiences (**Table 1**) than their heterosexual peers. Our results suggest that a  
4  
5  
6 negative school environment may play a potential role in the association between  
7  
8 sexual minority status and suicidal behavior among Chinese adolescents.  
9

10  
11 In addition, the highest risk of suicidal ideation and suicide attempts was determined  
12  
13 for BSA adolescents in our study. One possible explanation is that bisexual identified  
14  
15 individuals may experience more psychological distress and mental health problems  
16  
17 than homosexuals and heterosexuals due to their belief that they do not belong to a  
18  
19 particular group; Furthermore, they may suffer from minority stress by both  
20  
21 homosexuals and heterosexuals, which makes them more isolated and vulnerable to  
22  
23 chronic stress and could lead to an increased risk of suicide.<sup>38</sup>  
24  
25  
26

27  
28 Therefore, early detection and intervention programs (such as YRBSs) are urgently  
29  
30 needed for Chinese sexual minority adolescents to provide more social support  
31  
32 services (e.g., Gay-Straight Alliance groups and Parents and Friends of Lesbians and  
33  
34 Gays) as they cope with minority stress.<sup>39</sup> Furthermore, practitioners (e.g.,  
35  
36 psychologists, psychiatrists, counselors, and social workers) should specifically focus  
37  
38 on suicide risk among both-sex sexual minority status adolescents due to their weaker  
39  
40 collective identity. By increasing understanding and acceptance of both-sex sexual  
41  
42 minority status, we may be able to help those high-risk individuals cope with mental  
43  
44 health problems.<sup>40</sup>  
45  
46  
47  
48

49  
50 There are some noteworthy limitations that should be considered that would provide  
51  
52 important directions for future research. First, because of the cross-sectional design,  
53  
54 our study is limited to one time point of data collection, and no causal and temporal  
55  
56  
57  
58  
59  
60



1  
2  
3 relationships could be observed between sexual minority status and relational factors  
4  
5 regarding suicidal behavior. Second, our study used a structured, self-rating  
6  
7 questionnaire to collect data that could not completely rule out the possibility of recall  
8  
9 bias. Third, our study sample included only school students and did not include  
10  
11 adolescents who dropped out of school or were absent from school on the day the  
12  
13 survey was administered. Despite these limitations, the primary strengths of our study  
14  
15 are that it includes a large-scale, nationally representative sample of Chinese  
16  
17 adolescents, rendering us sufficient statistical power, and could avoid over-sampling  
18  
19 of the sexual minority population. Furthermore, to the best of our knowledge, our  
20  
21 study is the first to estimate the association between sexual minority status and  
22  
23 suicidal behavior among Chinese adolescents.  
24  
25  
26  
27  
28  
29  
30  
31  
32

### 33 **Conclusions**

34  
35 Suicide problems among sexual minority adolescents have raised global health  
36  
37 concerns. However, few related studies have been conducted among Chinese  
38  
39 adolescents. Findings from our study suggest that sexual minority adolescents are  
40  
41 associated with a higher risk of suicidal behavior among Chinese adolescents.  
42  
43  
44 Compared with their same-sex attraction peers, both-sex attraction males and females  
45  
46 were associated with an increased risk of suicidality. Based on the results of our study,  
47  
48 conducting early detection and intervention programs is suggested for Chinese sexual  
49  
50 minorities (especially both-sex attraction individuals) to more effectively and  
51  
52 pertinently prevent suicide-related problems. Future studies that focus on the risk  
53  
54  
55  
56  
57  
58  
59  
60

1  
2  
3 factors, mechanisms and interventions of suicidal behavior in Chinese sexual minority  
4  
5 adolescents are warranted.  
6  
7  
8  
9

### 10 **Contributors' Statement:**

11 Ciyong Lu conceptualized and designed the study, reviewed and revised the  
12 manuscript and approved the final manuscript as submitted. Yeen Huang and  
13 Pengsheng Li conceptualized and designed the study, coordinated and supervised data  
14 collection, carried out the initial analyses, drafted the initial manuscript, and approved  
15 the final manuscript as submitted. They contributed equally to this study. Lan Guo  
16 carried out the analyses and interpreted data, reviewed and revised the manuscript and  
17 approved the final manuscript as submitted. Xue Gao, Yan Xu, Guoliang Huang, and  
18 Xueqing Deng designed the data collection instruments, coordinated and supervised  
19 data collection, reviewed and revised the manuscript, and approved the final  
20 manuscript as submitted. All authors approved the final manuscript as submitted and  
21 agree to be accountable for all aspects of the work.  
22  
23  
24  
25  
26

27 **Acknowledgments:** The authors thank local health professionals, the Department of  
28 Education, and participating schools for their assistance and support. In addition, we  
29 express our gratitude to all the participants in our study.  
30  
31  
32

### 33 **References**

- 34 1. Remafedi G, French SA, Story M, et al. The relationship between suicide risk and  
35 sexual orientation: results of a population-based study. *Am J Public Health*  
36 1998;88:57-60.
- 37 2. Skerrett DM, Kolves K, De Leo D, et al. Are LGBT populations at a higher risk  
38 for suicidal behaviors in Australia? Research findings and implications. *J*  
39 *Homosex* 2015;62:883-901.
- 40 3. Russell ST, Joyner K. Adolescent sexual orientation and suicide risk: evidence  
41 from a national study. *Am J Public Health* 2001;91:1276-81.
- 42 4. Zhao Y, Montoro R, Igartua KJ, et al. Suicidal Ideation and Attempt Among  
43 Adolescents Reporting “Unsure” Sexual Identity or Heterosexual Identity Plus  
44 Same-Sex Attraction or Behavior: Forgotten Groups? *J Am Acad Child Adolesc*  
45 *Psychiatry* 2010;49:104-13.
- 46 5. Kann L, Olsen EO, Mcmanus T, et al. Sexual Identity, Sex of Sexual Contacts,  
47 and Health-Risk Behaviors among Students in Grades 9-12 —United States and  
48 selected Sites, 2015. *MMWR Surveill Summ* (Washington, D.C.: 2002)  
49 2016;65:19-20.
- 50 6. Wichstrøm L, Hegna K. Sexual orientation and suicide attempt: a longitudinal  
51 study of the general Norwegian adolescent population. *J Abnorm Psychol*  
52  
53  
54  
55  
56  
57  
58  
59  
60

- 2003;112:144-51.
7. Phillips MR, Li X, Zhang Y, et al. Suicide rates in China, 1995-99. *The Lancet* 2002;359:835-40.
8. Qin P, Mortensen PB. Specific characteristics of suicide in China. *Acta Psychiatr Scand* 2001;103:117-21.
9. Li Y, Li YF, Cao J, et al. Factors associated with suicidal behaviors in mainland China: a meta-analysis. *BMC Public Health* 2012;12:524.
10. Dai J, Chiu HF, Conner K R, et al. Suicidal ideation and attempts among rural Chinese aged 16—34 years — Socio-demographic correlates in the context of a transforming China. *J Affect Disord* 2011;130:438-46.
11. Zhang H, Wong WC, Ip P, et al. Health Status and Risk Behaviors of Sexual Minorities among Chinese Adolescents: A School-Based Survey. *J Homosex* 2017;64:382-96.
12. Chen H, Li Y, Wang L, et al. Causes of suicidal behaviors in men who have sex with men in China: a national questionnaire survey. *BMC Public Health* 2015;15:1-4.
13. Mu H, Li Y, Li L, et al. Prevalence and risk factors for lifetime suicide ideation, plan and attempt in Chinese men who have sex with men. *BMC Psychiatry* 2016;16:117.
14. Lian Q, Zuo X, Lou C, et al. Sexual orientation and risk factors for suicidal ideation and suicide attempts: a multi-centre cross-sectional study in three Asian cities. *J Epidemiol* 2015;25:155-61.
15. Swannell S, Martin G, Page A. Suicidal ideation, suicide attempts and non-suicidal self-injury among lesbian, gay, bisexual and heterosexual adults: Findings from an Australian national study. *Aust N Z J Psychiatry* 2016;50:145-53.
16. Pompili M, Lester D, Forte A, et al. Bisexuality and Suicide: A Systematic Review of the Current Literature. *J Sex Med* 2014;11:1903-13.
17. Wang H, Deng J, Zhou X, et al. The nonmedical use of prescription medicines among high school students: A cross-sectional study in Southern China. *Drug Alcohol Depend* 2014;141:9-15.
18. Guo L, Xu Y, Deng J, et al. Non-medical use of prescription pain relievers among high school students in China: a multilevel analysis. *BMJ Open* 2015;5:e007569.
19. Guo L, Xu Y, Deng J, et al. Associations between childhood maltreatment and non-medical use of prescription drugs among Chinese adolescents. *Addiction* 2017.
20. Garofalo R, Wolf RC, Kessel S, et al. The association between health risk behaviors and sexual orientation among a school-based sample of adolescents. *Pediatrics* 1998;101:895-902.
21. Guo L, Xu Y, Deng J, et al. Association between Nonmedical Use of Prescription Drugs and Suicidal Behavior among Adolescents. *JAMA Pediatr* 2016;170:971-78.
22. Langille DB, Asbridge M, Cragg A, et al. Associations of School Connectedness with Adolescent Suicidality: Gender Differences and the Role of Risk of

- 1  
2  
3 Depression. *Can J Psychiatry* 2015;60:258-67.
- 4 23. Woods ER, Lin YG, Middleman AB, et al. The associations of suicide attempts in  
5 adolescents. *Pediatrics* 1997;99:791-96.
- 6 24. Graham R, Berkowitz B, Blum R, et al. The health of lesbian, gay, bisexual, and  
7 transgender people: Building a foundation for better understanding. Washington,  
8 DC: Institute of Medicine 2011.
- 9 25. Lesbian, Gay, and Bisexual (LGB) Youth Sexual Orientation Measurement Work  
10 Group. Measuring Sexual Orientation of Young People in Health Research. San  
11 Francisco, CA: Gay and Lesbian Medical Association 2003.
- 12 26. Shields JP, Whitaker K, Glassman J, et al. Impact of victimization on risk of  
13 suicide among lesbian, gay, and bisexual high school students in San Francisco. *J*  
14 *Adolesc Health* 2012;50:418-20.
- 15 27. Olweus D. The revised Olweus bully/victim questionnaire. Bergen, Norway:  
16 University of Bergen 1996.
- 17 28. Wu J, He Y, Lu C, et al. Bullying behaviors among Chinese school-aged youth: A  
18 prevalence and correlates study in Guangdong province. *Psychiatry Res*  
19 2015;225:716-22.
- 20 29. Acierno R, Kilpatrick DG, Resnick HS, et al. Assault, PTSD, family substance  
21 use, and depression as risk factors for cigarette use in youth: findings from the  
22 National Survey of Adolescents. *J Trauma Stress* 2000;13:381-96.
- 23 30. Kandra KL, Mccullough A, Ranney L, et al. Support Among Middle School and  
24 High School Students for Smoke-free Policies, North Carolina, 2009. *Prev*  
25 *Chronic Dis* 2013;10:675-81.
- 26 31. Huang R, Ho SY, Wang MP, et al. Sociodemographic risk factors of alcohol  
27 drinking in Hong Kong adolescents. *J Epidemiol Community Health*  
28 2016;70:374-79.
- 29 32. Graaf RD, Sandfort TG, Have MT. Suicidality and sexual orientation: differences  
30 between men and women in a general population-based sample from the  
31 Netherlands. *Arch Sex Behav* 2006;35:253-62.
- 32 33. Meyer IH. Prejudice, social stress, and mental health in lesbian, gay, and bisexual  
33 populations: conceptual issues and research evidence. *Psychol Bull*  
34 2003;129:674-97.
- 35 34. Baams L, Grossman AH, Russell ST, et al. Minority stress and mechanisms of  
36 risk for depression and suicidal ideation among lesbian, gay, and bisexual youth.  
37 *Dev Psychol* 2015;51:688-96.
- 38 35. Kosciw JG, Greytak EA, Bartkiewicz MJ, et al. The 2011 National School  
39 Climate Survey: The experiences of lesbian, gay, bisexual and transgender youth  
40 in our nation's schools. New York: GLSEN 2012.
- 41 36. Bontempo DE, Augelli AR. Effects of at-school victimization and sexual  
42 orientation on lesbian, gay, or bisexual youths' health risk behavior. *J Adolesc*  
43 *Health* 2002;30:364-74.
- 44 37. Kwok DK, Wu J. Chinese attitudes towards sexual minorities in Hong Kong:  
45 Implications for mental health. *Int Rev Psychiatry* 2015;27:444-54.
- 46 38. Koh AS, Ross LK. Mental health issues: A comparison of lesbian, bisexual and  
47  
48  
49  
50  
51  
52  
53  
54  
55  
56  
57  
58  
59  
60

- 1  
2  
3 heterosexual women. *J Homosex* 2006;51:33-57.
- 4 39. Whitaker K, Shapiro VB, Shields JP, et al. School-Based Protective Factors  
5 Related to Suicide for Lesbian, Gay, and Bisexual Adolescents. *J Adolesc Health*  
6 2016;58:63-68.
- 7  
8 40. Eubankscarter C, Burckell LA, Goldfried MR, et al. Enhancing Therapeutic  
9 Effectiveness with Lesbian, Gay, and Bisexual Clients. *Clin Psychol*  
10 2006;12:1-18.
- 11  
12  
13  
14  
15  
16  
17  
18  
19  
20  
21  
22  
23  
24  
25  
26  
27  
28  
29  
30  
31  
32  
33  
34  
35  
36  
37  
38  
39  
40  
41  
42  
43  
44  
45  
46  
47  
48  
49  
50  
51  
52  
53  
54  
55  
56  
57  
58  
59  
60

For peer review only

**Table 1. Demographic characteristics of heterosexual and sexual minority Chinese adolescents (N=123,459).**

| <b>Variable</b>               | <b>Total<br/>No. (Weighted %)</b> | <b>Heterosexual<br/>No. (Weighted %)</b> | <b>Sexual minority<br/>No. (Weighted %)</b> | <b>P-value</b> |
|-------------------------------|-----------------------------------|------------------------------------------|---------------------------------------------|----------------|
| <b>Total</b>                  | 123,459 (100.00)                  | 116,774 (95.01)                          | 6,685 (4.99)                                |                |
| <b>Suicidal ideation</b>      |                                   |                                          |                                             | <0.001         |
| <b>No</b>                     | 100,772 (82.51)                   | 96,513 (83.44)                           | 4,259 (64.78)                               |                |
| <b>Yes</b>                    | 22,687 (17.49)                    | 20,261 (16.56)                           | 2,426 (35.22)                               |                |
| <b>Suicide attempts</b>       |                                   |                                          |                                             | <0.001         |
| <b>No</b>                     | 119,515 (97.04)                   | 113,543 (97.42)                          | 5,972 (89.79)                               |                |
| <b>Yes</b>                    | 3,944 (2.96)                      | 3,231 (2.58)                             | 713 (10.21)                                 |                |
| <b>Sex</b>                    |                                   |                                          |                                             | <0.001         |
| <b>Male</b>                   | 59,826 (52.20)                    | 57,343 (52.77)                           | 2,483 (41.37)                               |                |
| <b>Female</b>                 | 63,633 (47.80)                    | 59,431 (47.23)                           | 4,202 (58.63)                               |                |
| <b>Age (year)<sup>a</sup></b> | 15.30 (0.49)                      | 15.31 (0.49)                             | 15.09 (0.44)                                | 0.0428         |
| <b>Bullying experience</b>    |                                   |                                          |                                             | <0.001         |
| <b>No</b>                     | 113,435 (91.62)                   | 107,767 (92.03)                          | 5,668 (83.89)                               |                |
| <b>Yes</b>                    | 10,024 (8.38)                     | 9,007 (7.97)                             | 1,017 (16.11)                               |                |
| <b>Academic pressure</b>      |                                   |                                          |                                             | <0.001         |
| <b>None</b>                   | 18,111 (14.99)                    | 17,051 (14.93)                           | 1,060 (16.08)                               |                |
| <b>Less</b>                   | 55,709 (45.75)                    | 53,061 (46.06)                           | 2,648 (39.93)                               |                |
| <b>Medium or great</b>        | 49,639 (39.26)                    | 46,662 (39.01)                           | 2,977 (43.98)                               |                |
| <b>HSS<sup>b</sup></b>        |                                   |                                          |                                             | <0.001         |
| <b>Very good</b>              | 24,268 (21.91)                    | 22,812 (21.79)                           | 1,456 (24.23)                               |                |
| <b>Good</b>                   | 75,054 (60.86)                    | 71,306 (61.15)                           | 3,748 (55.36)                               |                |
| <b>Fair or poor</b>           | 24,137 (17.23)                    | 22,656 (17.07)                           | 1,481 (20.41)                               |                |
| <b>Current smoking</b>        |                                   |                                          |                                             | <0.001         |
| <b>No</b>                     | 116,144 (93.88)                   | 109,954 (93.94)                          | 6,190 (92.63)                               |                |
| <b>Yes</b>                    | 7,315 (6.12)                      | 6,820 (6.06)                             | 495 (7.37)                                  |                |
| <b>Current drinking</b>       |                                   |                                          |                                             | <0.001         |
| <b>No</b>                     | 101,981 (82.60)                   | 96,909 (82.91)                           | 5,072 (76.63)                               |                |
| <b>Yes</b>                    | 21,478 (17.40)                    | 19,865 (17.09)                           | 1,613 (23.37)                               |                |

<sup>a</sup> Age data are presented as the means (SE).

<sup>b</sup> HSS: Household socioeconomic status.

**Table 2. Prevalence of suicidal ideation and suicide attempts among heterosexual and sexual minority adolescents, by sex (N=123,459).**

|                          | Males (N=59,826) |             |               | Females (N=63,633) |             |               |
|--------------------------|------------------|-------------|---------------|--------------------|-------------|---------------|
|                          | Heterosexual=1   | SSA=2       | BSA=3         | Heterosexual=4     | SSA=5       | BSA=6         |
|                          | No. (W %)        | No. (W %)   | No. (W %)     | No. (W %)          | No. (W %)   | No. (W %)     |
| <b>Suicidal ideation</b> |                  |             |               |                    |             |               |
| <b>No</b>                | 48,572 (85.50)   | 795 (78.41) | 919 (65.31)   | 47,941 (81.15)     | 706 (69.60) | 1,839 (57.72) |
| <b>Yes</b>               | 8,771 (14.50)    | 243 (21.59) | 526 (34.69)   | 11,490 (18.85)     | 309 (30.40) | 1,348 (42.28) |
| <b>Suicide attempts</b>  |                  |             |               |                    |             |               |
| <b>No</b>                | 55,991 (97.83)   | 962 (93.09) | 1,267 (87.82) | 57,552 (96.96)     | 923 (91.08) | 2,820 (89.14) |
| <b>Yes</b>               | 1,352 (2.17)     | 76 (6.91)   | 178 (12.18)   | 1,879 (3.04)       | 92 (8.92)   | 367 (10.86)   |

Note: All analyses are weighted, frequencies are unweighted and prevalence is weighted;

SSA=same-sex attraction; BSA=both-sex attraction; W %=Weighted prevalence;

The alpha level for paired comparison was set at  $P=0.006$  after the Bonferroni correction.

**Paired comparison for suicidal ideation:**

2>1,  $P<0.001$     4>1,  $P<0.001$     5>4,  $P<0.001$

3>1,  $P<0.001$     5>2,  $P<0.001$     6>4,  $P<0.001$

3>2,  $P<0.001$     6>3,  $P=0.002$     6>5,  $P<0.001$

**Paired comparison for suicide attempts:**

2>1,  $P<0.001$     4>1,  $P<0.001$     5>4,  $P<0.001$

3>1,  $P<0.001$     5>2,  $P=0.119$     6>4,  $P<0.001$

3>2,  $P=0.011$     6>3,  $P=0.408$     6>5,  $P=0.0672$

**Table 3. Associations of sexual minority status with suicidal ideation and suicide attempts among Chinese adolescents, by sex (N=123,459).**

|                          | Model 1 <sup>a</sup> |           |        | Model 2 <sup>b</sup> |           |        |
|--------------------------|----------------------|-----------|--------|----------------------|-----------|--------|
|                          | OR                   | 95% CI    | P      | OR                   | 95% CI    | P      |
| <b>Suicidal ideation</b> |                      |           |        |                      |           |        |
| <b>Males</b>             |                      |           |        |                      |           |        |
| Heterosexual             | 1.0                  |           |        | 1.0                  |           |        |
| SSA                      | 1.62                 | 1.30-2.03 | <0.05  | 1.57                 | 1.28-1.92 | <0.05  |
| BSA                      | 3.14                 | 2.60-3.79 | <0.001 | 2.43                 | 2.04-2.90 | <0.001 |
| <b>Females</b>           |                      |           |        |                      |           |        |
| Heterosexual             | 1.0                  |           |        | 1.0                  |           |        |
| SSA                      | 1.86                 | 1.65-2.10 | <0.05  | 1.40                 | 1.28-1.54 | <0.01  |
| BSA                      | 3.16                 | 2.93-3.41 | <0.001 | 2.65                 | 2.45-2.87 | <0.001 |
| <b>Suicide attempts</b>  |                      |           |        |                      |           |        |
| <b>Males</b>             |                      |           |        |                      |           |        |
| Heterosexual             | 1.0                  |           |        | 1.0                  |           |        |
| SSA                      | 3.26                 | 2.40-4.44 | <0.05  | 3.10                 | 2.28-4.20 | <0.05  |
| BSA                      | 6.25                 | 4.46-8.75 | <0.001 | 3.88                 | 2.87-5.24 | <0.001 |
| <b>Females</b>           |                      |           |        |                      |           |        |
| Heterosexual             | 1.0                  |           |        | 1.0                  |           |        |
| SSA                      | 3.14                 | 2.37-4.15 | <0.001 | 1.94                 | 1.43-2.63 | <0.05  |
| BSA                      | 3.90                 | 3.13-4.84 | <0.001 | 2.64                 | 2.22-3.14 | <0.001 |

Note: SSA=same-sex attraction; BSA=both-sex attraction; CI=Confidence interval; OR=Odds ratio.

<sup>a</sup>Unadjusted.

<sup>b</sup>Adjusted for age, bullying experience, academic pressure, household socioeconomic status, current smoking and current drinking.



## STROBE Statement—checklist of items that should be included in reports of observational studies

|                              | Item No | Recommendation                                                                                                                                                                                                                                                                                                                                                                                                                                                                                                                                                                                                                                                                                                                             |
|------------------------------|---------|--------------------------------------------------------------------------------------------------------------------------------------------------------------------------------------------------------------------------------------------------------------------------------------------------------------------------------------------------------------------------------------------------------------------------------------------------------------------------------------------------------------------------------------------------------------------------------------------------------------------------------------------------------------------------------------------------------------------------------------------|
| <b>Title and abstract</b>    | 1       | (a) Indicate the study's design with a commonly used term in the title or the abstract<br><a href="#">Page 1</a><br>(b) Provide in the abstract an informative and balanced summary of what was done and what was found<br><a href="#">Page 1</a>                                                                                                                                                                                                                                                                                                                                                                                                                                                                                          |
| <b>Introduction</b>          |         |                                                                                                                                                                                                                                                                                                                                                                                                                                                                                                                                                                                                                                                                                                                                            |
| Background/rationale         | 2       | Explain the scientific background and rationale for the investigation being reported<br><a href="#">Page 2-3</a>                                                                                                                                                                                                                                                                                                                                                                                                                                                                                                                                                                                                                           |
| Objectives                   | 3       | State specific objectives, including any prespecified hypotheses<br><a href="#">Page 4</a>                                                                                                                                                                                                                                                                                                                                                                                                                                                                                                                                                                                                                                                 |
| <b>Methods</b>               |         |                                                                                                                                                                                                                                                                                                                                                                                                                                                                                                                                                                                                                                                                                                                                            |
| Study design                 | 4       | Present key elements of study design early in the paper<br><a href="#">Page 4-5</a>                                                                                                                                                                                                                                                                                                                                                                                                                                                                                                                                                                                                                                                        |
| Setting                      | 5       | Describe the setting, locations, and relevant dates, including periods of recruitment, exposure, follow-up, and data collection<br><a href="#">Page 5</a>                                                                                                                                                                                                                                                                                                                                                                                                                                                                                                                                                                                  |
| Participants                 | 6       | (a) <i>Cohort study</i> —Give the eligibility criteria, and the sources and methods of selection of participants. Describe methods of follow-up<br>NA.<br><i>Case-control study</i> —Give the eligibility criteria, and the sources and methods of case ascertainment and control selection. Give the rationale for the choice of cases and controls<br>NA.<br><i>Cross-sectional study</i> —Give the eligibility criteria, and the sources and methods of selection of participants<br><a href="#">Page 4-5</a><br>(b) <i>Cohort study</i> —For matched studies, give matching criteria and number of exposed and unexposed<br><i>Case-control study</i> —For matched studies, give matching criteria and the number of controls per case |
| Variables                    | 7       | Clearly define all outcomes, exposures, predictors, potential confounders, and effect modifiers. Give diagnostic criteria, if applicable<br><a href="#">Page 6-8</a>                                                                                                                                                                                                                                                                                                                                                                                                                                                                                                                                                                       |
| Data sources/<br>measurement | 8*      | For each variable of interest, give sources of data and details of methods of assessment (measurement). Describe comparability of assessment methods if there is more than one group<br><a href="#">Page 6-8</a>                                                                                                                                                                                                                                                                                                                                                                                                                                                                                                                           |
| Bias                         | 9       | Describe any efforts to address potential sources of bias<br><a href="#">Page 6</a>                                                                                                                                                                                                                                                                                                                                                                                                                                                                                                                                                                                                                                                        |
| Study size                   | 10      | Explain how the study size was arrived at<br><a href="#">Page 4-5</a>                                                                                                                                                                                                                                                                                                                                                                                                                                                                                                                                                                                                                                                                      |
| Quantitative variables       | 11      | Explain how quantitative variables were handled in the analyses. If applicable, describe which groupings were chosen and why                                                                                                                                                                                                                                                                                                                                                                                                                                                                                                                                                                                                               |

1  
2  
3  
4  
5  
6  
7  
8  
9  
10  
11  
12  
13  
14  
15  
16  
17  
18  
19  
20  
21  
22  
23  
24  
25  
26  
27  
28  
29  
30  
31  
32  
33  
34  
35  
36  
37  
38  
39  
40  
41  
42  
43  
44  
45  
46  
47  
48  
49  
50  
51  
52  
53  
54  
55  
56  
57  
58  
59  
60

|                     |    |                                                                                                                                                                                                                                                                                                                                                                                                                                                                                                                                                                                                                                                                                                                                                                        |
|---------------------|----|------------------------------------------------------------------------------------------------------------------------------------------------------------------------------------------------------------------------------------------------------------------------------------------------------------------------------------------------------------------------------------------------------------------------------------------------------------------------------------------------------------------------------------------------------------------------------------------------------------------------------------------------------------------------------------------------------------------------------------------------------------------------|
| Statistical methods | 12 | <a href="#">Page 8</a> <hr/> <i>(a)</i> Describe all statistical methods, including those used to control for confounding<br><a href="#">Page 8</a> <hr/> <i>(b)</i> Describe any methods used to examine subgroups and interactions<br><a href="#">NA.</a> <hr/> <i>(c)</i> Explain how missing data were addressed<br><a href="#">NA.</a> <hr/> <i>(d)</i> <i>Cohort study</i> —If applicable, explain how loss to follow-up was addressed<br><i>Case-control study</i> —If applicable, explain how matching of cases and controls was addressed<br><i>Cross-sectional study</i> —If applicable, describe analytical methods taking account of sampling strategy<br><a href="#">Page 8</a> <hr/> <i>(e)</i> Describe any sensitivity analyses<br><a href="#">NA.</a> |
|---------------------|----|------------------------------------------------------------------------------------------------------------------------------------------------------------------------------------------------------------------------------------------------------------------------------------------------------------------------------------------------------------------------------------------------------------------------------------------------------------------------------------------------------------------------------------------------------------------------------------------------------------------------------------------------------------------------------------------------------------------------------------------------------------------------|

Continued on next page

**Results**

|                   |     |                                                                                                                                                                                                                                                                                                                                                                                                                                                                                           |
|-------------------|-----|-------------------------------------------------------------------------------------------------------------------------------------------------------------------------------------------------------------------------------------------------------------------------------------------------------------------------------------------------------------------------------------------------------------------------------------------------------------------------------------------|
| Participants      | 13* | (a) Report numbers of individuals at each stage of study—eg numbers potentially eligible, examined for eligibility, confirmed eligible, included in the study, completing follow-up, and analysed<br><a href="#">Page 9</a><br>(b) Give reasons for non-participation at each stage<br><a href="#">NA.</a><br>(c) Consider use of a flow diagram<br><a href="#">NA.</a>                                                                                                                   |
| Descriptive data  | 14* | (a) Give characteristics of study participants (eg demographic, clinical, social) and information on exposures and potential confounders<br><a href="#">Page 9-10</a><br>(b) Indicate number of participants with missing data for each variable of interest<br><a href="#">NA.</a><br>(c) <i>Cohort study</i> —Summarise follow-up time (eg, average and total amount)<br><a href="#">NA.</a>                                                                                            |
| Outcome data      | 15* | <i>Cohort study</i> —Report numbers of outcome events or summary measures over time<br><a href="#">NA.</a><br><i>Case-control study</i> —Report numbers in each exposure category, or summary measures of exposure<br><a href="#">NA.</a><br><i>Cross-sectional study</i> —Report numbers of outcome events or summary measures<br><a href="#">Page 10-11</a>                                                                                                                             |
| Main results      | 16  | (a) Give unadjusted estimates and, if applicable, confounder-adjusted estimates and their precision (eg, 95% confidence interval). Make clear which confounders were adjusted for and why they were included<br><a href="#">Page 10-11</a><br>(b) Report category boundaries when continuous variables were categorized<br><a href="#">NA.</a><br>(c) If relevant, consider translating estimates of relative risk into absolute risk for a meaningful time period<br><a href="#">NA.</a> |
| Other analyses    | 17  | Report other analyses done—eg analyses of subgroups and interactions, and sensitivity analyses<br><a href="#">NA.</a>                                                                                                                                                                                                                                                                                                                                                                     |
| <b>Discussion</b> |     |                                                                                                                                                                                                                                                                                                                                                                                                                                                                                           |
| Key results       | 18  | Summarise key results with reference to study objectives<br><a href="#">Page 11-12</a>                                                                                                                                                                                                                                                                                                                                                                                                    |
| Limitations       | 19  | Discuss limitations of the study, taking into account sources of potential bias or imprecision. Discuss both direction and magnitude of any potential bias<br><a href="#">Page 14-15</a>                                                                                                                                                                                                                                                                                                  |
| Interpretation    | 20  | Give a cautious overall interpretation of results considering objectives, limitations, multiplicity of analyses, results from similar studies, and other relevant evidence<br><a href="#">Page 12-14</a>                                                                                                                                                                                                                                                                                  |
| Generalisability  | 21  | Discuss the generalisability (external validity) of the study results<br><a href="#">Page 15</a>                                                                                                                                                                                                                                                                                                                                                                                          |

**Other information**

---

Funding 22 Give the source of funding and the role of the funders for the present study and, if applicable, for the original study on which the present article is based

[Page 2](#)

\*Give information separately for cases and controls in case-control studies and, if applicable, for exposed and unexposed groups in cohort and cross-sectional studies.

**Note:** An Explanation and Elaboration article discusses each checklist item and gives methodological background and published examples of transparent reporting. The STROBE checklist is best used in conjunction with this article (freely available on the Web sites of PLoS Medicine at <http://www.plosmedicine.org/>, Annals of Internal Medicine at <http://www.annals.org/>, and Epidemiology at <http://www.epidem.com/>). Information on the STROBE Initiative is available at [www.strobe-statement.org](http://www.strobe-statement.org).

# BMJ Open

## Sexual minority status and suicidal behavior among Chinese adolescents: A large-scale cross-sectional study

|                                 |                                                                                                                                                                                                                                                                                                                                                                                                                                                                                                                                                                                                         |
|---------------------------------|---------------------------------------------------------------------------------------------------------------------------------------------------------------------------------------------------------------------------------------------------------------------------------------------------------------------------------------------------------------------------------------------------------------------------------------------------------------------------------------------------------------------------------------------------------------------------------------------------------|
| Journal:                        | <i>BMJ Open</i>                                                                                                                                                                                                                                                                                                                                                                                                                                                                                                                                                                                         |
| Manuscript ID                   | bmjopen-2017-020969.R1                                                                                                                                                                                                                                                                                                                                                                                                                                                                                                                                                                                  |
| Article Type:                   | Research                                                                                                                                                                                                                                                                                                                                                                                                                                                                                                                                                                                                |
| Date Submitted by the Author:   | 16-Apr-2018                                                                                                                                                                                                                                                                                                                                                                                                                                                                                                                                                                                             |
| Complete List of Authors:       | huang, yeen; School of Public Health, Sun Yat-sen University, Department of Medical Statistics and Epidemiology<br>Li, Pengsheng; School of Public Health, Sun Yat-sen University, Department of Medical Statistics and Epidemiology<br>Lan, Guo; Sun Yat-sen University, School of Public Health<br>Xue, Gao; Center for ADR Monitoring of Guangdong<br>Xu, Yan; Center for ADR Monitoring of Guangdong<br>Huang, Guoliang; Center for ADR Monitoring of Guangdong<br>Xueqing, Deng; School of Public Health, Sun Yat-sen University<br>Lu, CiYong; Department of medical statistics and epidemiology, |
| <b>Primary Subject Heading</b>: | Public health                                                                                                                                                                                                                                                                                                                                                                                                                                                                                                                                                                                           |
| Secondary Subject Heading:      | Epidemiology, Mental health                                                                                                                                                                                                                                                                                                                                                                                                                                                                                                                                                                             |
| Keywords:                       | PUBLIC HEALTH, SEXUAL MEDICINE, PAEDIATRICS                                                                                                                                                                                                                                                                                                                                                                                                                                                                                                                                                             |
|                                 |                                                                                                                                                                                                                                                                                                                                                                                                                                                                                                                                                                                                         |

SCHOLARONE™  
Manuscripts

only

## Sexual minority status and suicidal behavior among Chinese adolescents: A large-scale cross-sectional study

Yeen Huang<sup>a#</sup>, MD, Pengsheng Li<sup>a#</sup>, MD, Lan Guo<sup>a</sup>, MD, Xue Gao<sup>b</sup>, MD, Yan Xu<sup>b</sup>, MD, Guoliang Huang<sup>b</sup>, MS, Xueqing Deng<sup>a,c</sup>, MS, Ciyong Lu<sup>a,c</sup>, MD, PhD

**Affiliations:** <sup>a</sup> Department of Medical Statistics and Epidemiology, School of Public Health, Sun Yat-sen University, Guangzhou, China; <sup>b</sup> Center for ADR Monitoring of Guangdong, Guangzhou, China; <sup>c</sup> Guangdong Provincial Key Laboratory of Food, Nutrition and Health, Guangzhou, China

<sup>#</sup> These authors contributed equally to this work.

**Address correspondence to:** Ciyong Lu, Department of Medical Statistics and Epidemiology, School of Public Health, Sun Yat-sen University, Guangzhou, China #74, Zhongshan Road 2, Guangzhou 510080, P.R China, E-mail address: luciyong@mail.sysu.edu.cn, (+86) 020-87332477

### Abstract

**Objectives:** Suicidality among sexual minority adolescents have raised concern worldwide in recent decades, and previous Western studies have demonstrated that sexual minority status is associated with adolescent suicidality. However, whether this association exists in Chinese adolescents remains largely unknown. This study aimed to estimate the prevalence of suicidality and examine the associations between sexual minority status and suicidal behavior among Chinese adolescents.

**Design:** Cross-sectional survey.

**Setting:** A total of 506 high schools in seven provinces of China.

**Participants:** A total of 150,822 students in grades 7-12 who completed the questionnaires (response rate of 95.93%) were included.

**Main outcome measures:** Suicidal ideation, suicide attempts and same-sex romantic attraction.

**Results:** Of the 150,822 adolescents analyzed, 4.1% self-reported as sexual minorities, and 17.3% were unsure. Same-sex romantic attraction (males: 6.9%; females: 8.9%) and both-sex romantic attraction (males: 12.2%; females: 10.9%) adolescents reported a higher prevalence of past-year suicide attempts than heterosexual adolescents (males: 2.2%; females: 3.1%). Compared with their heterosexual peers, sexual minority adolescents were more likely to have past-year suicide attempts, and larger effects of past-year suicide attempts were reported in both-sex romantic attraction adolescents (males: AOR=3.83, 95% CI: 2.85-5.14; females: AOR=2.59, 95% CI: 2.19-3.06).

**Conclusions:** Our study suggested that Chinese sexual minority adolescents were associated with a higher risk of suicidality, and those with both-sex romantic attraction had an especially high risk in this population. These findings emphasized the urgent need to develop targeted interventions to effectively address suicide-related problems among Chinese sexual minority adolescents.

**Strengths and limitations of this study:**

- Our study estimated the prevalence of suicidality and examined the association between sexual minority status and suicidal behavior among Chinese adolescents
- A large-scale, nationally representative sample provided sufficient statistical power, and between-groups analyses were conducted.
- Due to the nature of the cross-sectional data, interpretation of the direction of the observed associations is limited.
- Our study sample included only students attending school and did not include adolescents who dropped out of school or were absent from school on the day the survey was administered.

**Funding source:** This work was supported by the National Natural Science Foundation of China (Grant number 81673252) and the Natural Science Foundation of Guangdong Province, China (Grant number 2014A030313174).

**Conflicting interests:** The authors have no conflicts of interest relevant to this article to disclose.

**Ethics approval:** The study protocol was approved by the Institutional Review Board of Sun Yat-sen University, School of Public Health.

**Data sharing statement:** No additional data are available.

**Introduction**

Suicidal behavior, which includes suicidal ideation, suicide attempts, and completed suicide, has raised concerns about the health of sexual minority adolescents (i.e., adolescents who experience same-sex attraction, engage in same-sex sexual behavior, or self-identify as gay, lesbian, bisexual) in recent decades. Minority stress theory<sup>1</sup> suggests that difficulties in dealing with minority stressors (prejudice, discrimination, and stigma) associated with same-sex orientation may lead to substance abuse<sup>2</sup>, depression<sup>3</sup>, and even suicide<sup>4</sup> among sexual minorities. Compared with their heterosexual peers, sexual minority adolescents have been identified in numerous studies as a high-risk group for suicidal behavior.<sup>5</sup> Regarding the associations of sexual minority status with suicidal behavior, most related studies have been

1  
2  
3 conducted in Western or developed countries. A previous findings from the Youth  
4 Risk Behavior Survey (YRBS) in the United States showed that approximately 42.8%  
5 and 29.4% of sexual minority adolescents reported having past-year suicidal ideation  
6 and suicide attempts, respectively.<sup>6</sup> Two longitudinal studies from the United States  
7 and Norway showed that sexual minority adolescents were twice and four times more  
8 likely, respectively, to have attempted suicide in the past year than their heterosexual  
9 peers.<sup>5,7</sup> Moreover, a previous systematic review indicated that bisexual individuals  
10 from developed countries have the highest levels of suicide risk among sexual  
11 minorities.<sup>8</sup> Those findings thus identified sexual minority status as a risk factor for  
12 adolescent suicidality in Western or developed countries.

13  
14  
15  
16  
17  
18  
19  
20  
21  
22  
23  
24  
25  
26  
27  
28  
29  
30  
31  
32  
33  
34  
35  
36  
37  
38  
39  
40  
41  
42  
43  
44  
45  
46  
47  
48  
49  
50  
51  
52  
53  
54  
55  
56  
57  
58  
59  
60  
China as the largest developing country with a high suicide rate, accounts for 21%  
of the world's population and 30-40% of the world's suicides,<sup>9</sup> and although  
numerous studies focus on suicide risk in Chinese adolescents,<sup>10,11</sup> little attention has  
been devoted to sexual minorities. Previous studies in China have shown that  
4.6%-12.6% of gay adults have reported lifetime suicide attempts<sup>12,13</sup> and sexual  
minority youth from Taipei were almost twice as likely to have past-year suicidal  
ideation as their heterosexual peers.<sup>14</sup> It is well known that the cultural background of  
Western countries is different from that of Asian countries, especially China, where  
Confucianism has been an influence for thousands of years and families and social  
climates exert intense pressure on individuals to marry and have children to maintain  
their family lineages.<sup>15</sup> Thus, sexual minorities are recognized as a major impediment  
to continuing the family line and maintaining a family's reputation,<sup>16</sup> and



1  
2  
3 homosexuals in China may experience more minority stressors and higher levels of  
4 mental and behavioral problems.<sup>17,18</sup> However, there is a paucity of research exploring  
5 the associations between sexual minority status and suicidal behavior among  
6 mainland Chinese adolescents, whether this well-known increased suicide risk for  
7 sexual minorities can also be found in Chinese adolescents remains largely unknown.  
8  
9

10  
11 Therefore, we conducted this nationally large-scale study to estimate the prevalence  
12 of suicidality among Chinese sexual minority adolescents, to evaluate the associations  
13 between sexual minority status and suicidal ideation and attempts, to investigate  
14 whether these associations vary in different sexual minority statuses, and to provide  
15 suggestions about effective policymaking and develop intervention strategies for  
16 governmental public health organizations.  
17  
18  
19  
20  
21  
22  
23  
24  
25  
26  
27  
28  
29  
30  
31  
32

## 33 **Methods**

### 34 *2.1 Study design and participants*

35 We utilized data from the 2015 School-Based Chinese Adolescents Health Survey  
36 (SCAHS),<sup>19,20</sup> an ongoing, large-scale health-related behavior survey among Chinese  
37 adolescents (grades 7-12). The SCAHS has been conducted every two years since  
38 2007, and the 2015 survey was the most recent version conducted in seven Chinese  
39 provinces.<sup>21</sup>  
40  
41  
42  
43  
44  
45  
46  
47  
48  
49

50 In the 2015 SCAHS, students were selected via a 4-stage, stratified-cluster,  
51 random-sampling method. In stage 1, all 34 province-level regions in China were  
52 divided into four regional strata (East China, West China, South China, and North  
53  
54  
55  
56  
57  
58  
59  
60

1  
2  
3  
4 China), and then two representative provinces from each regional strata were selected  
5  
6 by simple randomization (only one province from East China). In stage 2, cities in  
7  
8 each representative province were divided into three economic strata (high-level,  
9  
10 middle-level, and low-level) by per capita GDP (gross domestic product). Based on  
11  
12 the proportions of these three types of cities, six cities were randomly selected from  
13  
14 each representative province. In stage 3, schools were divided into three categories:  
15  
16 junior high schools (i.e., grades 7-9), senior high schools (i.e., grades 10-12), and  
17  
18 vocational high schools (i.e., grades 7-12). Based on the proportions of these three  
19  
20 types of schools, four junior high schools, four senior high schools, and four  
21  
22 vocational high schools were randomly selected from each representative city (506  
23  
24 schools agreed to participate in this study). In stage 4, two classes were randomly  
25  
26 selected from each grade within the selected schools, and all available students in the  
27  
28 selected classes were invited to participate in this study voluntarily. In total, 150,822  
29  
30 students completed the questionnaires (response rate of 95.93%).  
31  
32  
33  
34  
35  
36  
37  
38  
39

## 40 *2.2 Data collection*

41  
42 All students from the chosen classes were given a standardized self-administered  
43  
44 questionnaire on the day of the survey, to be completed in the classroom during a  
45  
46 normal class period (40 or 45 minutes). To protect student privacy, the questionnaire  
47  
48 was completed by each student participant anonymously without the presence of  
49  
50 teachers or other school personnel (to avoid any potential information bias). All data  
51  
52 were collected from November 2014 to January 2015.  
53  
54  
55  
56  
57

### 2.3 Ethics statement

This study was approved by the Sun Yat-Sen University School of Public Health Institutional Review Board. Written informed consent was obtained from each participating student who was at least 18 years old, or from one of the student's parents (or legal guardian) if the student was under 18 years old.

### 2.4 Measures

#### 2.4.1 Suicidal ideation and suicide attempts

Suicidal ideation was defined as responding "1 or more times" to the following question: "During the past 12 months, how many times did you seriously consider attempting suicide?" Suicide attempts were assessed by asking students to respond to the following question with zero, once, or more: "During the past 12 months, how many times did you actually attempt suicide?"<sup>22,23</sup>

#### 2.4.2 Sexual minority status

The number of transsexuals among sexual minority adolescents is still very low<sup>24</sup> and hard to investigate in our school-based survey, so this minority group was not included in this study. Sexual minority status was measured by asking students the following question regarding sexual attraction: "In a romantic relationship, what kind of person are you attracted to?" Response options included the following: (1) opposite sex, (2) same sex, (3) equally opposite sex and same sex, and (4) unsure.<sup>25,26</sup> Respondents were classified as the following categories: (1) heterosexual, (2) same-sex romantic attraction (SSA), (3) both-sex romantic attraction (BSA), and (4) unsure. Students who belonged to categories (2) and (3) were classified as sexual

1  
2  
3 minorities.

#### 4 5 6 *2.4.3 Demographic variables*

7  
8 Factors previously reported to be associated with suicidal behavior in sexual minority  
9 adolescents were taken into consideration.<sup>4,5,27</sup> Demographic variables included sex,  
10 age, academic pressure, household socioeconomic status (HSS), current smoking,  
11 current drinking, and bullying experience.  
12  
13  
14  
15  
16

17  
18 After reading a brief definition of bullying from the Olweus Bully/Victim  
19 Questionnaire, adolescents were asked the following question: “How often have you  
20 been bullied (kicked, intentionally excluded from participating, made fun of with  
21 sexual jokes, etc.) at school in the past 30 days?”<sup>28</sup> Answers were given on a 3-point  
22 scale as follows: (1) never, (2) sometimes or rarely (one or two times), or (3) often  
23 (more than three times). Students reporting a frequency of “often” in the past 30 days  
24 were classified as being bullied.<sup>29</sup> Academic pressure was assessed based on students’  
25 self-rating about their school work; responses were coded as follows: (1) none, (2)  
26 less, or (3) medium or great. HSS was measured by asking about the student’s  
27 perception of his or her household’s current socioeconomic status; responses were  
28 coded as follows: (1) very good, (2) good, and (3) fair or poor. Current smoking was  
29 measured by asking the following question: “During the past 30 days, on how many  
30 days did you smoke cigarettes?” Students who selected answers indicating 1 or more  
31 days were classified as current smokers.<sup>30,31</sup> Current drinking was assessed with the  
32 following question: “During the past 30 days, on how many days did you drink  
33 alcohol?” Students who selected answers indicating 1 or more days were classified as  
34  
35  
36  
37  
38  
39  
40  
41  
42  
43  
44  
45  
46  
47  
48  
49  
50  
51  
52  
53  
54  
55  
56  
57  
58  
59  
60

1  
2  
3 current drinkers.<sup>32</sup>  
4  
5

### 6 *2.5 Statistical analysis*

7

8 Prevalence estimates and logistic regression analyses used appropriate sampling  
9 weights (adjusting for students' grade, sex, and school location) and estimation  
10 procedures that accounted for the complex sampling design. Taylor series estimation  
11 methods were utilized to obtain proper standard error estimates. First, descriptive  
12 analyses were conducted to describe the demographic characteristics and prevalence  
13 of suicidality. Second, Rao-Scott chi-square tests and one-way ANOVA were used to  
14 compare the differences in demographic characteristics and suicide rates between  
15 groups. Third, univariate logistic regression models were performed to explore the  
16 associations between sexual minority status and suicidal ideation and suicide attempts  
17 without the confounding effects of sex. Additional multivariate models were  
18 sequentially adjusted for age, academic pressure, HSS, current smoking current  
19 drinking, and bullying experience. Based on previously reported studies,<sup>33,34</sup> age,  
20 socio-family environment (e.g., academic pressure and HSS), unhealthy behaviors  
21 (e.g., smoking and drinking), and school environment (e.g., bullying experience) were  
22 associated with suicidal behaviors in China, and all were added as covariates to  
23 determine the independent associations between sexual minority status and suicidality.  
24  
25 Missing data accounted for less than 3.1% for all relevant variables and were  
26 eliminated in the analyses. OR (odds ratios) and 95% CI (confidence intervals) were  
27 obtained from logistic regression models. *P*-values less than 0.05 were considered  
28 statistically significant (tested 2-sided) for regression analysis. The alpha level for  
29  
30  
31  
32  
33  
34  
35  
36  
37  
38  
39  
40  
41  
42  
43  
44  
45  
46  
47  
48  
49  
50  
51  
52  
53  
54  
55  
56  
57  
58  
59  
60

1  
2  
3 paired comparison was set by Bonferroni correction. All statistical analyses were  
4  
5 conducted using SAS 9.4 (SAS Institute, Inc., Cary, NC, USA).  
6  
7  
8  
9

## 10 **Results**

### 11 *3.1 Demographic characteristics*

12  
13 The characteristics of the students are shown in **Table 1**. Of the total sample, the mean  
14  
15 (SE) age of the adolescents was 15.1 (0.4) years old; 51.8% were males, and 48.2%  
16  
17 were females. Among these adolescents, 4.1% self-reported as sexual minorities, 17.3%  
18  
19 as unsure, and 78.6% as heterosexual. Compared with their unsure and heterosexual  
20  
21 peers, sexual minority adolescents were more likely to be females ( $P<0.001$ ), to come  
22  
23 from a family with poor socioeconomic status ( $P<0.001$ ), and to report medium or  
24  
25 great academic pressure ( $P<0.001$ ). Additionally, sexual minority adolescents were  
26  
27 also more likely to report smoking, alcohol use, and school bullying experiences  
28  
29 during the past 30 days than their unsure and heterosexual peers.  
30  
31  
32  
33  
34  
35  
36  
37

### 38 *3.2 Prevalence of suicidality by sexual minority status*

39  
40 As shown in **Table 2**, for male adolescents, the weighted prevalence of past-year  
41  
42 suicidal ideation was more frequently reported in sexual minority (SSA: 21.6%; BSA:  
43  
44 34.7%) adolescents than in their heterosexual (14.50%) and unsure (11.7%) peers, and  
45  
46 BSA students reported the highest rate of past-year suicidal ideation. The weighted  
47  
48 prevalence of past-year suicide attempts was higher in sexual minority (SSA: 6.9%;  
49  
50 BSA: 12.2%) and unsure (3.1%) adolescents than in their heterosexual peers (2.2%),  
51  
52  
53  
54  
55 and BSA students reported the highest rate of past-year suicide attempts.  
56  
57  
58  
59  
60

1  
2  
3  
4 As for female adolescents, the weighted prevalence of past-year suicidal ideation  
5  
6 was higher in sexual minority (SSA: 30.4%; BSA: 42.3%) adolescents than in their  
7  
8 heterosexual (18.8%) and unsure (14.9%) peers, with BSA students having the highest  
9  
10 prevalence. The weighted prevalence of past-year suicide attempts was higher in  
11  
12 sexual minority adolescents (SSA: 8.9%; BSA: 10.9%) than in their heterosexual  
13  
14 (3.1%) and unsure (3.2%) peers, and BSA adolescents reported the highest rate of  
15  
16 past-year suicide attempts.  
17  
18  
19

### 20 *3.3 Associations between sexual minority status and suicidal ideation and suicide* 21 *attempts* 22 23 24

25 As shown in **Table 3**, for male adolescents, unadjusted analyses (model 1) showed  
26  
27 that SSA and BSA adolescents were associated with higher suicidal ideation and  
28  
29 suicide attempts than their heterosexual peers. After adjustment for academic pressure,  
30  
31 HSS, current smoking, current drinking, and bullying experience (model 2), SSA  
32  
33 (AOR=1.56, 95% CI: 1.26-1.94) and BSA (AOR=2.42, 95% CI: 2.03-2.88)  
34  
35 adolescents were more likely to report suicidal ideation than their heterosexual and  
36  
37 unsure peers. Compared with heterosexual peers, SSA (AOR=3.13, 95% CI:  
38  
39 2.28-4.28), BSA (AOR=3.83, 95% CI: 2.85-5.14), and unsure (AOR=1.55, 95% CI:  
40  
41 1.24-1.94) male adolescents were more likely to have suicide attempts.  
42  
43  
44  
45  
46  
47

48 As for female adolescents, unadjusted analyses (model 1) showed that SSA and  
49  
50 BSA adolescents were associated with higher suicidal ideation and suicide attempts  
51  
52 than their heterosexual and unsure peers. After adjustment for academic pressure,  
53  
54 HSS, current smoking, current drinking, and bullying experience (model 2). SSA  
55  
56  
57  
58  
59  
60

(OR=1.42, 95% CI: 1.30-1.56) and BSA (OR=2.61, 95% CI: 2.41-2.82) adolescents were more likely to report suicidal ideation than their heterosexual and unsure peers. Compared with heterosexual peers, SSA (OR=1.97, 95% CI: 1.43-2.70) and BSA (OR=2.59, 95% CI: 2.19-3.06) female students were more likely to have suicide attempts.

Moreover, in both male and female adolescents, differences in sexual minority status were larger for suicide attempts than for suicidal ideation, and BSA adolescents reported the highest risk of suicide attempts.

## Discussion

As in many studies in Western or developed countries, we determined that Chinese sexual minority adolescents had a higher risk of suicidal ideation and suicide attempts than their heterosexual peers; being a BSA male or female was associated with an increased risk of suicidality. To our knowledge, this study is the first to utilize nationally representative data to explore the associations between sexual minority status and suicidal behavior among Chinese adolescents.

Consistent with previous studies,<sup>4-6</sup> our results additionally revealed that sexual minority adolescents had a higher prevalence of both suicidal ideation and suicide attempts than their heterosexual peers. Compared with a cross-sectional survey conducted with sexual minority youths from three Asian cities (Hanoi, Shanghai, and Taipei),<sup>14</sup> the prevalence of past-year suicidal ideation and suicide attempts in our sexual minority samples was similar to that in Taipei samples, but higher than that in



1  
2  
3 Shanghai and Hanoi samples. This variation in results may derive from the different  
4  
5 sample sources and age structures. Our findings provide population-based evidence of  
6  
7 the prevalence of suicidal behavior among Chinese sexual minorities, which is useful  
8  
9 for identifying adolescents who may be at high risk of suicide.  
10  
11

12  
13 Furthermore, we found that, compared with their heterosexual peers, Chinese  
14  
15 sexual minority adolescents were associated with an increased risk of suicidality after  
16  
17 stratification by sex. To our knowledge, because of their insufficient sample sizes,  
18  
19 most previous studies combined individuals with different sexual minority statuses  
20  
21 into one category without considering sex stratification, which may obscure the  
22  
23 estimates of suicide risk among high-risk adolescents.<sup>35,36</sup> This study is the first to  
24  
25 utilize a nationally large-scale sample to explore the associations between sexual  
26  
27 minority status and suicidal behavior among Chinese adolescents grouped according  
28  
29 to sexual minority status and stratified by sex. Our results are consistent with a  
30  
31 previous systematic review that reported elevated risks of past-year suicide attempts  
32  
33 in homosexual and bisexual adolescents, especially males.<sup>37</sup> One possible mechanism  
34  
35 to explain these associations is the experience of minority stress.<sup>1</sup> According to the  
36  
37 minority stress model, sexual minority individuals may experience minority stressors  
38  
39 (e.g., prejudice events, internalized homophobia), which are related to lower  
40  
41 well-being and higher levels of suicidal ideation.<sup>38</sup> Previous results from a 2011  
42  
43 National School Climate Survey indicated that more than 60-80% of sexual minority  
44  
45 students reported being verbally harassed and that 40% of students experienced  
46  
47 physical violence at school during the past year.<sup>39</sup> Experiences such as being  
48  
49  
50  
51  
52  
53  
54  
55  
56  
57  
58  
59  
60

1  
2  
3 threatened or injured are directly related to suicidality among sexual minority  
4 adolescents.<sup>40</sup> In current Chinese society, stigma against nonheterosexual individuals  
5  
6 persists, and a large portion of the general population shows intolerant attitudes  
7  
8 toward sexual minorities.<sup>41</sup> In our study, we also found that Chinese sexual minorities  
9  
10 have a higher prevalence of bullying experiences than their heterosexual peers.  
11  
12 Therefore, a negative school environment may play a potential role in the  
13  
14 associations between sexual minority status and suicidal behavior among Chinese  
15  
16 adolescents.  
17  
18  
19  
20  
21  
22

23 In line with previous studies,<sup>37,42</sup> our study found that sexual orientation differences  
24  
25 were more apparent for suicide attempts than for suicidal ideation, and a higher  
26  
27 effects of suicide attempts were more common for BSA adolescents than their SSA  
28  
29 and heterosexual peers. Several reasons may explain the more severe forms of  
30  
31 suicidality among the bisexual group. First, bisexual individuals may experience  
32  
33 additional forms of minority stress from both homosexuals and heterosexuals, and the  
34  
35 various forms of biphobia and monosexism can create emotional and cognitive  
36  
37 dysfunction that may lead to depression, anxiety, or even suicide attempts.<sup>1,43</sup> Second,  
38  
39 bisexual individuals are pervasively invisible in society. Heterosexual and  
40  
41 homosexual people have mutual interests in maintaining the primacy of monosexual  
42  
43 assumptions and binary sexual orientation, which may contribute to an internalized  
44  
45 sense of belief that bisexuals do not belong to any particular sexual minority group.  
46  
47 The lack of a sense of belonging may be one of the factors contributing to suicide  
48  
49 attempts among bisexual people.<sup>8,43</sup> Third, lack of social and healthcare support was  
50  
51  
52  
53  
54  
55  
56  
57  
58  
59  
60

1  
2  
3 more commonly reported among bisexual individuals than among their homosexual  
4  
5 and heterosexual peers, and this lack of support made bisexuals feel more socially  
6  
7 isolated and vulnerable to chronic stress and led to an increased risk of suicide.<sup>44</sup>  
8  
9  
10 Moreover, our results reported that 17.3% of adolescents reported being unsure about  
11  
12 sexual romantic attraction, which is consistent with previous research.<sup>45</sup> In accordance  
13  
14 with a previous systematic review,<sup>37</sup> the risks of past-year suicide attempts was  
15  
16 smaller for unsure adolescents than for sexual minorities in our study. However,  
17  
18 previous studies reported that unsure adolescents may show same-sex attraction or  
19  
20 behaviors<sup>46</sup> and thus may experience minority stress (e.g., bullying victimization),<sup>47</sup>  
21  
22 leading to health disparities such as depression, anxiety,<sup>48</sup> and suicidal ideation.<sup>49</sup>  
23  
24  
25 Therefore, further research to explore the prevalence and mechanisms of suicidality  
26  
27 among unsure adolescents is needed.  
28  
29  
30  
31

32  
33 Chinese sexual minorities suffer from minority stressors due to discrimination,  
34  
35 homophobia and other conditions in the social environment impacted by traditional  
36  
37 Chinese culture (which is rooted in Confucian philosophies).<sup>50</sup> Confucianism  
38  
39 emphasizes the continuation of the family line and filial piety to protect the family's  
40  
41 reputation and lineage (e.g., prior to 2016, the One-Child Policy; from 2016 to the  
42  
43 present, the Two-Child Policy).<sup>16</sup> Although attitudes toward Chinese sexual minorities  
44  
45 have become more positive in particular populations (e.g., younger or highly educated  
46  
47 people),<sup>51</sup> a large proportion of the Chinese population still holds negative attitudes  
48  
49 toward sexual minorities. Same-sex orientation is still considered to conflict with  
50  
51 traditional values and associated with prejudice and stigma in the current Chinese  
52  
53  
54  
55  
56  
57  
58  
59  
60

1  
2  
3 social context.<sup>52</sup> These negative attitudes toward sexual minorities and minority  
4 stressors that they experience have been linked to high levels of mental and  
5  
6 behavioral problems, such as depression and suicide attempts.<sup>17,18</sup> In this study, our  
7  
8 findings suggested that sexual minority status was associated with suicidal behavior  
9  
10 among Chinese adolescents, and that BSA individuals were the highest-risk group in  
11  
12 this population. Therefore, the following appropriate interventions for suicidality  
13  
14 among Chinese sexual minority adolescents are recommended: First, schools and  
15  
16 related public health organizations should formulate policies to prevent students from  
17  
18 experiencing minority stressors (e.g., being bullied at school) to reduce discrimination  
19  
20 and create a generally positive school climate. Second, online resources (e.g., online  
21  
22 sex education websites) should be integrated to provide more relevant information  
23  
24 and education, which may help to foster a more tolerant and open atmosphere toward  
25  
26 sexual minorities. Third, families and communities should provide social support (e.g.,  
27  
28 Gay-Straight Alliance groups, and Parents and Friends of Lesbians and Gays) to  
29  
30 promote acceptance for sexual minority orientation<sup>53</sup> and reduce pressure from  
31  
32 traditional values and norms embedded in Confucianism (e.g., filial piety and family  
33  
34 responsibilities).<sup>51</sup> Fourth, practitioners (e.g., psychologists, psychiatrists, counselors,  
35  
36 and social workers) should specifically focus on the group that is at particularly high  
37  
38 suicide risk (e.g., BSA adolescents) with a weaker collective identity. Developing  
39  
40 early and effective suicide-related preventive interventions (e.g., treatment of  
41  
42 depression, anxiety, and their comorbidities)<sup>13</sup> can help improve mental well-being in  
43  
44 high-risk sexual minority adolescents.  
45  
46  
47  
48  
49  
50  
51  
52  
53  
54  
55  
56  
57  
58  
59  
60

1  
2  
3  
4 Some noteworthy limitations should be considered when interpreting the results of  
5  
6 this study. First, due to the cross-sectional design, it is difficult to make causal  
7  
8 inferences. Second, our study used a structured self-rating questionnaire to collect  
9  
10 data. Although self-reporting is a common and accepted method in sexuality research  
11  
12 on adolescents, we could not completely rule out the possibility of recall bias and  
13  
14 misclassification bias. Third, our study sample included only students attending  
15  
16 school and did not include adolescents who dropped out of school or were absent  
17  
18 from school on the day the survey was administered; suicidality may be more  
19  
20 common among sexual minority students who were absent, possibly leading to  
21  
22 underestimation of the sexual orientation disparities in our study. Fourth, we used the  
23  
24 item on same-sex romantic attraction to measure sexual minority status, and the  
25  
26 results might not be comparable to those in other studies using sexual orientation as a  
27  
28 measurement. However, our measure is particularly appropriate for surveying the  
29  
30 health of sexual minority adolescents<sup>45</sup> and is more likely to capture a broad range of  
31  
32 adolescents who have “come out” or acknowledged romantic attraction but may not  
33  
34 have adopted a homosexual identity,<sup>5</sup> which may help to identify that high-risk  
35  
36 population. Despite these limitations, the primary strengths of our study are that it  
37  
38 includes a nationally large-scale sample of Chinese adolescents, which provides  
39  
40 sufficient statistical power and may avoid over-sampling of the sexual minority  
41  
42 population. Furthermore, to the best of our knowledge, our study is the first study  
43  
44 investigating the risk for suicidal behavior among Chinese sexual minority  
45  
46 adolescents in a representative sample.  
47  
48  
49  
50  
51  
52  
53  
54  
55  
56

## Conclusions

Increases in suicide risk among sexual minority adolescents have raised global health concerns. However, few related studies have been conducted among Chinese adolescents. The findings from our study suggested that Chinese sexual minority adolescents were associated with a higher risk of suicidal behavior and that BSA adolescents have the highest risk of suicidality regardless of their sex. Based on our study results, conducting early detection and intervention programs for Chinese sexual minorities (especially BSA individuals) is suggested to more effectively and appropriately prevent suicide-related problems. Future studies that focus on the risk factors, mechanisms and interventions of suicidal behavior in Chinese sexual minority adolescents are warranted.

## Contributors' Statement:

Ciyong Lu conceptualized and designed the study, reviewed and revised the manuscript and approved the final manuscript as submitted. Yeen Huang and Pengsheng Li conceptualized and designed the study, coordinated and supervised the data collection, carried out the initial analyses, drafted the initial manuscript, and approved the final manuscript as submitted. They contributed equally to this study. Lan Guo carried out the analyses and interpreted the data, reviewed and revised the manuscript and approved the final manuscript as submitted. Xue Gao, Yan Xu, Guoliang Huang, and Xueqing Deng designed the data collection instruments, coordinated and supervised the data collection, reviewed and revised the manuscript, and approved the final manuscript as submitted. All authors approved the final manuscript as submitted and agree to be accountable for all aspects of the work.

**Acknowledgments:** The authors would like to thank local health professionals, the Department of Education, and participating schools for their assistance and support. In addition, we express our gratitude to all the participants in our study.

## References:

1. Meyer IH. Prejudice, social stress, and mental health in lesbian, gay, and bisexual populations: conceptual issues and research evidence. *Psychol Bull* 2003;129:674-697.
2. Marshal M P, Friedman M S, Stall R, et al. Sexual orientation and adolescent substance use: a meta-analysis and methodological review. *Addiction* 2008;103:546-556.
3. Marshal M P, Dietz L J, Friedman M S, et al. Suicidality and depression disparities between sexual minority and heterosexual youth: a meta-analytic review. *J Adolesc Health* 2011;49:115-123.
4. Remafedi G, French SA, Story M, et al. The relationship between suicide risk and sexual orientation: results of a population-based study. *Am J Public Health* 1998;88:57-60.
5. Russell ST, Joyner K. Adolescent sexual orientation and suicide risk: evidence from a national study. *Am J Public Health* 2001;91:1276-1281.
6. Kann L, Olsen EO, Mcmanus T, et al. Sexual identity, sex of sexual contacts, and health-risk behaviors among students in grades 9-12 —United States and selected Sites, 2015. *MMWR Surveill Summ (Washington, D.C.: 2002)* 2016;65:19-20.
7. Wichstrøm L, Hegna K. Sexual orientation and suicide attempt: a longitudinal study of the general Norwegian adolescent population. *J Abnorm Psychol* 2003;112:144-151.
8. Salway T, Ross L E, Fehr C P, et al. A systematic review and meta-analysis of disparities in the prevalence of suicide ideation and attempt among bisexual populations. *Arch Sex Behav*, 2018:1-23.
9. Phillips MR, Li X, Zhang Y, et al. Suicide rates in China, 1995-99. *The Lancet* 2002;359:835-840.
10. Liu X C, Chen H, Liu Z Z, et al. Prevalence of suicidal behaviour and associated factors in a large sample of Chinese adolescents. *Epidemiol Psychiatr Sci* 2017:1-10.
11. Guo L, Xu Y, Deng J, et al. Association between sleep duration, suicidal ideation, and suicidal attempts among Chinese adolescents: The moderating role of depressive symptoms. *J Affect Disord* 2017;208:355-362.
12. Chen H, Li Y, Wang L, et al. Causes of suicidal behaviors in men who have sex with men in China: a national questionnaire survey. *BMC Public Health* 2015;15:1-4.
13. Mu H, Li Y, Li L, et al. Prevalence and risk factors for lifetime suicide ideation, plan and attempt in Chinese men who have sex with men. *BMC Psychiatry* 2016;16:1-10.
14. Lian Q, Zuo X, Lou C, et al. Sexual orientation and risk factors for suicidal ideation and suicide attempts: a multi-centre cross-sectional study in three Asian cities. *J Epidemiol* 2015;25:155-161.
15. Zhan H J, Montgomery R J V. Gender and elder care in China: The influence of filial piety and structural constraints. *Gender & Society* 2003;17:209-229.
16. Hsu M H, Waters J A. Filial Piety and sexual prejudice in Chinese culture.

- Attitude Measures 2001;11.
17. Feng Y, Wu Z, Detels R. Evolution of men who have sex with men community and experienced stigma among men who have sex with men in Chengdu, China. *J Acquir Immune Defic Syndr* 2010;53:98-103.
  18. Liu J X, Choi K. Experiences of social discrimination among Men Who Have Sex with Men in Shanghai, China. *AIDS Behav* 2006;10:25-33.
  19. Wang H, Deng J, Zhou X, et al. The nonmedical use of prescription medicines among high school students: A cross-sectional study in Southern China. *Drug Alcohol Depend* 2014;141:9-15.
  20. Guo L, Xu Y, Deng J, et al. Non-medical use of prescription pain relievers among high school students in China: a multilevel analysis. *BMJ Open* 2015;5:e007569.
  21. Guo L, Xu Y, Deng J, et al. Associations between childhood maltreatment and non-medical use of prescription drugs among Chinese adolescents. *Addiction* 2017;112:1600-1609.
  22. Guo L, Xu Y, Deng J, et al. Association between nonmedical use of prescription drugs and suicidal behavior among adolescents. *JAMA Pediatr* 2016;170:971-978.
  23. Woods ER, Lin YG, Middleman AB, et al. The associations of suicide attempts in adolescents. *Pediatrics* 1997;99:791-796.
  24. Arcelus J, Bouman W P, Noortgate W V D, et al. Systematic review and meta-analysis of prevalence studies in transsexualism. *Eur Psychiatry* 2015;30:807-815.
  25. Lesbian, Gay, and Bisexual (LGB) Youth Sexual Orientation Measurement Work Group. *Measuring sexual orientation of young people in health research*. San Francisco, CA: Gay and Lesbian Medical Association 2003.
  26. Li P, Huang Y, Guo L, et al. Sexual attraction and the nonmedical use of opioids and sedative drugs among Chinese adolescents. *Drug Alcohol Depend* 2018;183:169-175.
  27. Shields JP, Whitaker K, Glassman J, et al. Impact of victimization on risk of suicide among lesbian, gay, and bisexual high school students in San Francisco. *J Adolesc Health* 2012;50:418-420.
  28. Olweus D. *The revised Olweus bully/victim questionnaire*. Bergen, Norway: University of Bergen 1996.
  29. Wu J, He Y, Lu C, et al. Bullying behaviors among Chinese school-aged youth: A prevalence and correlates study in Guangdong province. *Psychiatry Res* 2015;225:716-722.
  30. Acierno R, Kilpatrick DG, Resnick HS, et al. Assault, PTSD, family substance use, and depression as risk factors for cigarette use in youth: findings from the National Survey of Adolescents. *J Trauma Stress* 2000;13:381-396.
  31. Kandra KL, McCullough A, Ranney L, et al. Support among middle school and high school students for smoke-free policies, North Carolina, 2009. *Prev Chronic Dis* 2013;10:675-681.
  32. Huang R, Ho SY, Wang MP, et al. Sociodemographic risk factors of alcohol



- 1  
2  
3 drinking in Hong Kong adolescents. *J Epidemiol Community Health*  
4 2016;70:374-379.
- 5 33. Li Y, Li YF, Cao J, et al. Factors associated with suicidal behaviors in mainland  
6 China: a meta-analysis. *BMC Public Health* 2012;12:1-13.
- 7 34. Dai J, Chiu HF, Conner K R, et al. Suicidal ideation and attempts among rural  
8 Chinese aged 16-34 years--Socio-demographic correlates in the context of a  
9 transforming China. *J Affect Disord* 2011;130:438-446.
- 10 35. Swannell S, Martin G, Page A. Suicidal ideation, suicide attempts and  
11 non-suicidal self-injury among lesbian, gay, bisexual and heterosexual adults:  
12 Findings from an Australian national study. *Aust N Z J Psychiatry*  
13 2016;50:145-153.
- 14 36. Graaf RD, Sandfort TG, Have MT. Suicidality and sexual orientation:  
15 differences between men and women in a general population-based sample from  
16 the Netherlands. *Arch Sex Behav* 2006;35:253-262.
- 17 37. Plöderl M, Tremblay P. Mental health of sexual minorities. A systematic review.  
18 *Int Rev Psychiatry* 2015;27:367-385.
- 19 38. Baams L, Grossman AH, Russell ST, et al. Minority stress and mechanisms of  
20 risk for depression and suicidal ideation among lesbian, gay, and bisexual youth.  
21 *Dev Psychol* 2015;51:688-696.
- 22 39. Kosciw JG, Greytak EA, Bartkiewicz MJ, et al. The 2011 National School  
23 Climate Survey: The experiences of lesbian, gay, bisexual and transgender youth  
24 in our nation's schools. New York: GLSEN 2012.
- 25 40. Bontempo DE, Augelli AR. Effects of at-school victimization and sexual  
26 orientation on lesbian, gay, or bisexual youths' health risk behavior. *J Adolesc*  
27 *Health* 2002;30:364-374.
- 28 41. Kwok DK, Wu J. Chinese attitudes towards sexual minorities in Hong Kong:  
29 Implications for mental health. *Int Rev Psychiatry* 2015;27:444-454.
- 30 42. Pompili M, Lester D, Forte A, et al. Bisexuality and suicide: a systematic review  
31 of the current literature. *J Sex Med* 2014;11:1903-1913.
- 32 43. Hatzenbuehler M L. How does sexual minority stigma "Get Under the Skin"? a  
33 psychological mediation framework. *Psychol Bull* 2009;135:707-730.
- 34 44. Koh AS, Ross LK. Mental health issues: A comparison of lesbian, bisexual and  
35 heterosexual women. *J Homosex* 2006;51:33-57.
- 36 45. Saewyc E M, Bauer G R, Skay C L, et al. Measuring sexual orientation in  
37 adolescent health surveys: Evaluation of eight school-based surveys. *J Adolesc*  
38 *Health* 2004;35:345.e1-e15.
- 39 46. Igartua K, Thombs B D, Burgos G, et al. Concordance and discrepancy in sexual  
40 identity, attraction, and behavior among adolescents. *J Adolesc Health*  
41 2009;45:602-608.
- 42 47. Birkett M, Russell S T, Corliss H L. Sexual-orientation disparities in school: the  
43 mediational role of indicators of victimization in achievement and truancy  
44 because of feeling unsafe. *Am J Public Health* 2014;104:1124-1128.
- 45 48. Sara B. Oswalt MPH PhD, Tammy J. Wyatt PhD. Sexual orientation and  
46 differences in mental health, stress, and academic performance in a national  
47  
48  
49  
50  
51  
52  
53  
54  
55  
56

- 1  
2  
3 sample of U.S. College Students. *J Homosex* 2011;58:1255-1280.
- 4 49. Zhao Y, Montoro R, Igartua K, et al. Suicidal ideation and attempt among  
5 adolescents reporting "unsure" sexual identity or heterosexual identity plus  
6 same-sex attraction or behavior: forgotten groups?. *J Am Acad Child Adolesc*  
7 *Psychiatry* 2010;49:104-113.
- 8  
9 50. Kwok D K. School experience of Chinese sexual minority students in Hong  
10 Kong. *J LGBT Youth* 2016;13:378-396.
- 11 51. Chi X, Hawk S T. Attitudes toward same-sex attraction and behavior among  
12 Chinese university students: tendencies, correlates, and gender differences.  
13 *Front Psychol* 2016;7:1-9.
- 14  
15 52. Lin K, Button D M, Su M, et al. Chinese college students' attitudes toward  
16 homosexuality: exploring the effects of traditional culture and modernizing  
17 factors. *Sex Res Social Policy* 2016;13:158-172.
- 18  
19 53. Whitaker K, Shapiro VB, Shields JP, et al. School-based protective factors  
20 related to suicide for lesbian, gay, and bisexual adolescents. *J Adolesc Health*  
21 2016;58:63-68.
- 22  
23  
24  
25  
26  
27  
28  
29  
30  
31  
32  
33  
34  
35  
36  
37  
38  
39  
40  
41  
42  
43  
44  
45  
46  
47  
48  
49  
50  
51  
52  
53  
54  
55  
56  
57  
58  
59  
60

**Table 1. Demographic characteristics of participants by sexual minority status among Chinese adolescents (N=150,822).**

| Variable                      | Total<br>No. (%) | Heterosexual<br>No. (%) | Sexual minorities <sup>a</sup><br>No. (%) | Unsure<br>No. (%) | $\chi^2/F$ | P-value |
|-------------------------------|------------------|-------------------------|-------------------------------------------|-------------------|------------|---------|
| <b>Total</b>                  | 150,822 (100.00) | 116,774 (78.6)          | 6,685 (4.1)                               | 27,363 (17.3)     |            |         |
| <b>Sex</b>                    |                  |                         |                                           |                   | 182.90     | <0.001  |
| <b>Male</b>                   | 72,409 (51.8)    | 57,343 (52.8)           | 2,483 (41.4)                              | 12,583 (49.7)     |            |         |
| <b>Female</b>                 | 78,413 (48.2)    | 59,431 (47.2)           | 4,202 (58.6)                              | 14,780 (50.3)     |            |         |
| <b>Age (year)<sup>b</sup></b> | 15.1 (0.4)       | 15.3 (0.5)              | 15.1 (0.4)                                | 14.1 (0.3)        | 754.33     | <0.001  |
| <b>Academic pressure</b>      |                  |                         |                                           |                   | 567.69     | <0.001  |
| <b>None</b>                   | 23,387 (15.8)    | 17,051 (14.9)           | 1,060 (16.1)                              | 5,276 (19.8)      |            |         |
| <b>Less</b>                   | 69,359 (46.5)    | 53,061 (46.1)           | 2,648 (39.9)                              | 13,650 (49.8)     |            |         |
| <b>Medium or great</b>        | 58,076 (37.7)    | 46,662 (39.0)           | 2,977 (44.0)                              | 8,437 (30.4)      |            |         |
| <b>HSS<sup>c</sup></b>        |                  |                         |                                           |                   | 204.56     | <0.001  |
| <b>Very good</b>              | 30,766 (22.7)    | 22,812 (21.8)           | 1,456 (24.2)                              | 6,498 (26.6)      |            |         |
| <b>Good</b>                   | 90,894 (60.3)    | 71,306 (61.1)           | 3,748 (55.4)                              | 15,840 (57.4)     |            |         |
| <b>Fair or poor</b>           | 29,162 (17.0)    | 22,656 (17.1)           | 1,481 (20.4)                              | 5,025 (16.0)      |            |         |
| <b>Current smoking</b>        |                  |                         |                                           |                   | 288.12     | <0.001  |
| <b>No</b>                     | 143,032 (94.6)   | 110,194 (94.1)          | 6,212 (93.0)                              | 26,626 (97.3)     |            |         |
| <b>Yes</b>                    | 7,790 (5.4)      | 6,580 (5.9)             | 473 (7.0)                                 | 737 (2.7)         |            |         |
| <b>Current drinking</b>       |                  |                         |                                           |                   | 818.05     | <0.001  |
| <b>No</b>                     | 126,765 (84.0)   | 96,909 (82.9)           | 5,072 (76.6)                              | 24,784 (90.5)     |            |         |
| <b>Yes</b>                    | 24,057 (16.0)    | 19,865 (17.1)           | 1,613 (23.4)                              | 2,579 (9.5)       |            |         |
| <b>Bullying experience</b>    |                  |                         |                                           |                   | 57.58      | <0.001  |
| <b>No</b>                     | 138,523 (91.6)   | 107,767 (92.0)          | 5,668 (83.9)                              | 25,088 (91.3)     |            |         |
| <b>Yes</b>                    | 12,299 (8.4)     | 9,007 (8.0)             | 1,017 (16.1)                              | 2,275 (8.7)       |            |         |

<sup>a</sup>Sexual minorities included adolescents who reported same-sex or both-sex romantic attraction.

1  
2  
3  
4  
5  
6  
7  
8  
9  
10  
11  
12  
13  
14  
15  
16  
17  
18  
19  
20  
21  
22  
23  
24  
25  
26  
27  
28  
29  
30  
31  
32  
33  
34  
35  
36  
37  
38  
39  
40  
41  
42  
43  
44  
45  
46  
47

<sup>b</sup> Age data are presented as means (SE).

<sup>c</sup> HSS, Household socioeconomic status.

All numbers were unweighted, whereas all percentages were adjusted for sampling weights.

For peer review only

**Table 2. Prevalence of past-year suicidal ideation and suicide attempts by sexual minority status among Chinese adolescents (N=150,822).**

|                          | Males (N=72,409) |            |              |               | Females (N=78,413) |            |              |               |
|--------------------------|------------------|------------|--------------|---------------|--------------------|------------|--------------|---------------|
|                          | Heterosexual=1   | SSA=2      | BSA=3        | Unsure=4      | Heterosexual=5     | SSA=6      | BSA=7        | Unsure=8      |
|                          | No. (%)          | No. (%)    | No. (%)      | No. (%)       | No. (%)            | No. (%)    | No. (%)      | No. (%)       |
| <b>Suicidal ideation</b> |                  |            |              |               |                    |            |              |               |
| <b>No</b>                | 48,572 (85.5)    | 795 (78.4) | 919 (65.3)   | 11,067 (88.3) | 47,941 (81.2)      | 706 (69.6) | 1,839 (57.7) | 12,527 (85.1) |
| <b>Yes</b>               | 8,771 (14.5)     | 243 (21.6) | 526 (34.7)   | 1,516 (11.7)  | 11,490 (18.8)      | 309 (30.4) | 1,348 (42.3) | 2,253 (14.9)  |
| <b>Suicide attempts</b>  |                  |            |              |               |                    |            |              |               |
| <b>No</b>                | 55,991 (97.8)    | 962 (93.1) | 1,267 (87.8) | 12,184 (96.9) | 57,552 (96.9)      | 923 (91.1) | 2,820 (89.1) | 14,318 (96.8) |
| <b>Yes</b>               | 1,352 (2.2)      | 76 (6.9)   | 178 (12.2)   | 399 (3.1)     | 1,879 (3.1)        | 92 (8.9)   | 367 (10.9)   | 462 (3.2)     |

SSA, same-sex romantic attraction; BSA, both-sex romantic attraction;

All numbers were unweighted, whereas all percentages were adjusted for sampling weights.

The alpha level for paired comparison was set at  $P=0.0083$  after Bonferroni correction.

**Paired comparison for suicidal ideation:**

2>1,  $\chi^2=51.42$ ,  $P<0.001$ ;

6>5,  $\chi^2=78.41$ ,  $P<0.001$ ;

3>1,  $\chi^2=471.59$ ,  $P<0.001$ ;

7>5,  $\chi^2=978.63$ ,  $P<0.001$ ;

3>2,  $\chi^2=47.69$ ,  $P<0.001$ ;

7>6,  $\chi^2=45.29$ ,  $P<0.001$ ;

4<1,  $\chi^2=86.74$ ,  $P<0.001$ ;

8<5,  $\chi^2=131.20$ ,  $P<0.001$ ;

4<2,  $\chi^2=110.08$ ,  $P<0.001$ ;

8<6,  $\chi^2=161.47$ ,  $P<0.001$ ;

4<3,  $\chi^2=618.07$ ,  $P<0.001$ ;

8<7,  $\chi^2=1197.33$ ,  $P<0.001$ ;

**Paired comparison for suicide attempts:**

2>1,  $\chi^2=105.29$ ,  $P<0.001$ ;

6>5,  $\chi^2=110.22$ ,  $P<0.001$ ;

3>1,  $\chi^2=551.67$ ,  $P<0.001$ ;

7>5,  $\chi^2=610.42$ ,  $P<0.001$ ;

3>2,  $\chi^2=16.42$ ,  $P<0.001$ ;

7>6,  $\chi^2=4.76$ ,  $P=0.029$ ;

4>1,  $\chi^2=27.95$ ,  $P<0.001$ ;

8>5,  $\chi^2=0.05$ ,  $P=0.824$ ;

4<2,  $\chi^2=49.09$ ,  $P<0.001$ ;

8<6,  $\chi^2=98.96$ ,  $P<0.001$ ;

4<3,  $\chi^2=274.99$ ,  $P<0.001$ ;

8<7,  $\chi^2=419.29$ ,  $P<0.001$ ;

**Table 3. Associations of sexual minority status with past-year suicidal ideation and suicide attempts among Chinese adolescents (N=150,822).**

|                          | Model 1 <sup>a</sup> |           |        | Model 2 <sup>b</sup> |           |        |
|--------------------------|----------------------|-----------|--------|----------------------|-----------|--------|
|                          | OR                   | 95% CI    | P      | AOR                  | 95% CI    | P      |
| <b>Suicidal ideation</b> |                      |           |        |                      |           |        |
| <b>Males</b>             |                      |           |        |                      |           |        |
| Heterosexual             | 1.0                  |           |        | 1.0                  |           |        |
| SSA                      | 1.62                 | 1.30-2.03 | <0.001 | 1.56                 | 1.26-1.94 | <0.001 |
| BSA                      | 3.13                 | 2.59-3.79 | <0.001 | 2.42                 | 2.03-2.88 | <0.001 |
| Unsure                   | 0.78                 | 0.67-0.91 | <0.001 | 0.78                 | 0.69-0.87 | <0.001 |
| <b>Females</b>           |                      |           |        |                      |           |        |
| Heterosexual             | 1.0                  |           |        | 1.0                  |           |        |
| SSA                      | 1.88                 | 1.67-2.11 | <0.001 | 1.42                 | 1.30-1.56 | <0.001 |
| BSA                      | 3.15                 | 2.93-3.39 | <0.001 | 2.61                 | 2.41-2.82 | <0.001 |
| Unsure                   | 0.75                 | 0.60-0.94 | <0.001 | 0.71                 | 0.61-0.83 | <0.001 |
| <b>Suicide attempts</b>  |                      |           |        |                      |           |        |
| <b>Males</b>             |                      |           |        |                      |           |        |
| Heterosexual             | 1.0                  |           |        | 1.0                  |           |        |
| SSA                      | 3.29                 | 2.43-4.47 | <0.001 | 3.13                 | 2.28-4.28 | <0.001 |
| BSA                      | 6.25                 | 4.46-8.76 | <0.001 | 3.83                 | 2.85-5.14 | <0.001 |
| Unsure                   | 1.42                 | 1.07-1.90 | <0.001 | 1.55                 | 1.24-1.94 | <0.001 |
| <b>Females</b>           |                      |           |        |                      |           |        |
| Heterosexual             | 1.0                  |           |        | 1.0                  |           |        |
| SSA                      | 3.13                 | 2.36-4.15 | <0.001 | 1.97                 | 1.43-2.70 | <0.001 |
| BSA                      | 3.89                 | 3.13-4.83 | <0.001 | 2.59                 | 2.19-3.06 | <0.001 |
| Unsure                   | 1.04                 | 0.75-1.44 | 0.824  | 1.03                 | 0.80-1.34 | 0.531  |

SSA, same-sex romantic attraction; BSA, both-sex romantic attraction; CI, confidence interval; OR, odds ratio; AOR, adjusted odds ratio.

<sup>a</sup>Unadjusted.

<sup>b</sup>Adjusted for age, academic pressure, household socioeconomic status, current smoking, current drinking, and bullying experience.

## STROBE Statement—checklist of items that should be included in reports of observational studies

|                              | Item No | Recommendation                                                                                                                                                                                                                                                                                                                                                                                                                                                                                                                                                                                                                                                                                                                             |
|------------------------------|---------|--------------------------------------------------------------------------------------------------------------------------------------------------------------------------------------------------------------------------------------------------------------------------------------------------------------------------------------------------------------------------------------------------------------------------------------------------------------------------------------------------------------------------------------------------------------------------------------------------------------------------------------------------------------------------------------------------------------------------------------------|
| <b>Title and abstract</b>    | 1       | (a) Indicate the study's design with a commonly used term in the title or the abstract<br><a href="#">Page 1</a><br>(b) Provide in the abstract an informative and balanced summary of what was done and what was found<br><a href="#">Page 1</a>                                                                                                                                                                                                                                                                                                                                                                                                                                                                                          |
| <b>Introduction</b>          |         |                                                                                                                                                                                                                                                                                                                                                                                                                                                                                                                                                                                                                                                                                                                                            |
| Background/rationale         | 2       | Explain the scientific background and rationale for the investigation being reported<br><a href="#">Page 2-3</a>                                                                                                                                                                                                                                                                                                                                                                                                                                                                                                                                                                                                                           |
| Objectives                   | 3       | State specific objectives, including any prespecified hypotheses<br><a href="#">Page 4</a>                                                                                                                                                                                                                                                                                                                                                                                                                                                                                                                                                                                                                                                 |
| <b>Methods</b>               |         |                                                                                                                                                                                                                                                                                                                                                                                                                                                                                                                                                                                                                                                                                                                                            |
| Study design                 | 4       | Present key elements of study design early in the paper<br><a href="#">Page 4-5</a>                                                                                                                                                                                                                                                                                                                                                                                                                                                                                                                                                                                                                                                        |
| Setting                      | 5       | Describe the setting, locations, and relevant dates, including periods of recruitment, exposure, follow-up, and data collection<br><a href="#">Page 5</a>                                                                                                                                                                                                                                                                                                                                                                                                                                                                                                                                                                                  |
| Participants                 | 6       | (a) <i>Cohort study</i> —Give the eligibility criteria, and the sources and methods of selection of participants. Describe methods of follow-up<br>NA.<br><i>Case-control study</i> —Give the eligibility criteria, and the sources and methods of case ascertainment and control selection. Give the rationale for the choice of cases and controls<br>NA.<br><i>Cross-sectional study</i> —Give the eligibility criteria, and the sources and methods of selection of participants<br><a href="#">Page 4-5</a><br>(b) <i>Cohort study</i> —For matched studies, give matching criteria and number of exposed and unexposed<br><i>Case-control study</i> —For matched studies, give matching criteria and the number of controls per case |
| Variables                    | 7       | Clearly define all outcomes, exposures, predictors, potential confounders, and effect modifiers. Give diagnostic criteria, if applicable<br><a href="#">Page 6-8</a>                                                                                                                                                                                                                                                                                                                                                                                                                                                                                                                                                                       |
| Data sources/<br>measurement | 8*      | For each variable of interest, give sources of data and details of methods of assessment (measurement). Describe comparability of assessment methods if there is more than one group<br><a href="#">Page 6-8</a>                                                                                                                                                                                                                                                                                                                                                                                                                                                                                                                           |
| Bias                         | 9       | Describe any efforts to address potential sources of bias<br><a href="#">Page 5</a>                                                                                                                                                                                                                                                                                                                                                                                                                                                                                                                                                                                                                                                        |
| Study size                   | 10      | Explain how the study size was arrived at<br><a href="#">Page 4-5</a>                                                                                                                                                                                                                                                                                                                                                                                                                                                                                                                                                                                                                                                                      |
| Quantitative variables       | 11      | Explain how quantitative variables were handled in the analyses. If applicable, describe which groupings were chosen and why                                                                                                                                                                                                                                                                                                                                                                                                                                                                                                                                                                                                               |

1  
2  
3  
4  
5  
6  
7  
8  
9  
10  
11  
12  
13  
14  
15  
16  
17  
18  
19  
20  
21  
22  
23  
24  
25  
26  
27  
28  
29  
30  
31  
32  
33  
34  
35  
36  
37  
38  
39  
40  
41  
42  
43  
44  
45  
46  
47  
48  
49  
50  
51  
52  
53  
54  
55  
56  
57  
58  
59  
60

Page 8

---

Statistical methods 12 (a) Describe all statistical methods, including those used to control for confounding

Page 8

---

(b) Describe any methods used to examine subgroups and interactions

NA.

---

(c) Explain how missing data were addressed

NA.

---

(d) *Cohort study*—If applicable, explain how loss to follow-up was addressed

*Case-control study*—If applicable, explain how matching of cases and controls was addressed

*Cross-sectional study*—If applicable, describe analytical methods taking account of sampling strategy

Page 8

---

(e) Describe any sensitivity analyses

NA.

Continued on next page



## Results

|                   |     |                                                                                                                                                                                                                                                                                                                                                                                                                                                                                           |
|-------------------|-----|-------------------------------------------------------------------------------------------------------------------------------------------------------------------------------------------------------------------------------------------------------------------------------------------------------------------------------------------------------------------------------------------------------------------------------------------------------------------------------------------|
| Participants      | 13* | (a) Report numbers of individuals at each stage of study—eg numbers potentially eligible, examined for eligibility, confirmed eligible, included in the study, completing follow-up, and analysed<br><a href="#">Page 9</a><br>(b) Give reasons for non-participation at each stage<br><a href="#">NA.</a><br>(c) Consider use of a flow diagram<br><a href="#">NA.</a>                                                                                                                   |
| Descriptive data  | 14* | (a) Give characteristics of study participants (eg demographic, clinical, social) and information on exposures and potential confounders<br><a href="#">Page 9</a><br>(b) Indicate number of participants with missing data for each variable of interest<br><a href="#">NA.</a><br>(c) <i>Cohort study</i> —Summarise follow-up time (eg, average and total amount)<br><a href="#">NA.</a>                                                                                               |
| Outcome data      | 15* | <i>Cohort study</i> —Report numbers of outcome events or summary measures over time<br><a href="#">NA.</a><br><i>Case-control study</i> —Report numbers in each exposure category, or summary measures of exposure<br><a href="#">NA.</a><br><i>Cross-sectional study</i> —Report numbers of outcome events or summary measures<br><a href="#">Page 9-11</a>                                                                                                                              |
| Main results      | 16  | (a) Give unadjusted estimates and, if applicable, confounder-adjusted estimates and their precision (eg, 95% confidence interval). Make clear which confounders were adjusted for and why they were included<br><a href="#">Page 10-11</a><br>(b) Report category boundaries when continuous variables were categorized<br><a href="#">NA.</a><br>(c) If relevant, consider translating estimates of relative risk into absolute risk for a meaningful time period<br><a href="#">NA.</a> |
| Other analyses    | 17  | Report other analyses done—eg analyses of subgroups and interactions, and sensitivity analyses<br><a href="#">NA.</a>                                                                                                                                                                                                                                                                                                                                                                     |
| <b>Discussion</b> |     |                                                                                                                                                                                                                                                                                                                                                                                                                                                                                           |
| Key results       | 18  | Summarise key results with reference to study objectives<br><a href="#">Page 11</a>                                                                                                                                                                                                                                                                                                                                                                                                       |
| Limitations       | 19  | Discuss limitations of the study, taking into account sources of potential bias or imprecision. Discuss both direction and magnitude of any potential bias<br><a href="#">Page 16</a>                                                                                                                                                                                                                                                                                                     |
| Interpretation    | 20  | Give a cautious overall interpretation of results considering objectives, limitations, multiplicity of analyses, results from similar studies, and other relevant evidence<br><a href="#">Page 11-15</a>                                                                                                                                                                                                                                                                                  |
| Generalisability  | 21  | Discuss the generalisability (external validity) of the study results<br><a href="#">Page 14-15</a>                                                                                                                                                                                                                                                                                                                                                                                       |

**Other information**

---

Funding 22 Give the source of funding and the role of the funders for the present study and, if applicable, for the original study on which the present article is based

[Page 2](#)

\*Give information separately for cases and controls in case-control studies and, if applicable, for exposed and unexposed groups in cohort and cross-sectional studies.

**Note:** An Explanation and Elaboration article discusses each checklist item and gives methodological background and published examples of transparent reporting. The STROBE checklist is best used in conjunction with this article (freely available on the Web sites of PLoS Medicine at <http://www.plosmedicine.org/>, Annals of Internal Medicine at <http://www.annals.org/>, and Epidemiology at <http://www.epidem.com/>). Information on the STROBE Initiative is available at [www.strobe-statement.org](http://www.strobe-statement.org).

# BMJ Open

## Sexual minority status and suicidal behavior among Chinese adolescents: A nationally representative cross-sectional study

|                                 |                                                                                                                                                                                                                                                                                                                                                                                                                                                                                                                                                                                                         |
|---------------------------------|---------------------------------------------------------------------------------------------------------------------------------------------------------------------------------------------------------------------------------------------------------------------------------------------------------------------------------------------------------------------------------------------------------------------------------------------------------------------------------------------------------------------------------------------------------------------------------------------------------|
| Journal:                        | <i>BMJ Open</i>                                                                                                                                                                                                                                                                                                                                                                                                                                                                                                                                                                                         |
| Manuscript ID                   | bmjopen-2017-020969.R2                                                                                                                                                                                                                                                                                                                                                                                                                                                                                                                                                                                  |
| Article Type:                   | Research                                                                                                                                                                                                                                                                                                                                                                                                                                                                                                                                                                                                |
| Date Submitted by the Author:   | 22-Jun-2018                                                                                                                                                                                                                                                                                                                                                                                                                                                                                                                                                                                             |
| Complete List of Authors:       | huang, yeen; School of Public Health, Sun Yat-sen University, Department of Medical Statistics and Epidemiology<br>Li, Pengsheng; School of Public Health, Sun Yat-sen University, Department of Medical Statistics and Epidemiology<br>Lan, Guo; Sun Yat-sen University, School of Public Health<br>Xue, Gao; Center for ADR Monitoring of Guangdong<br>Xu, Yan; Center for ADR Monitoring of Guangdong<br>Huang, Guoliang; Center for ADR Monitoring of Guangdong<br>Xueqing, Deng; School of Public Health, Sun Yat-sen University<br>Lu, CiYong; Department of medical statistics and epidemiology, |
| <b>Primary Subject Heading</b>: | Public health                                                                                                                                                                                                                                                                                                                                                                                                                                                                                                                                                                                           |
| Secondary Subject Heading:      | Epidemiology, Mental health                                                                                                                                                                                                                                                                                                                                                                                                                                                                                                                                                                             |
| Keywords:                       | PUBLIC HEALTH, SEXUAL MEDICINE, PAEDIATRICS                                                                                                                                                                                                                                                                                                                                                                                                                                                                                                                                                             |
|                                 |                                                                                                                                                                                                                                                                                                                                                                                                                                                                                                                                                                                                         |

SCHOLARONE™  
Manuscripts

1  
2  
3 **Sexual minority status and suicidal behavior among Chinese adolescents: A**  
4 **nationally representative cross-sectional study**  
5

6  
7 Yeen Huang<sup>a#</sup>, MD, Pengsheng Li<sup>a#</sup>, MD, Lan Guo<sup>a</sup>, MD, Xue Gao<sup>b</sup>, MD, Yan Xu<sup>b</sup>,  
8 MD, Guoliang Huang<sup>b</sup>, MS, Xueqing Deng<sup>a,c</sup>, MS, Ciyong Lu<sup>a,c</sup>, MD, PhD  
9

10 **Affiliations:** <sup>a</sup> Department of Medical Statistics and Epidemiology, School of Public  
11 Health, Sun Yat-sen University, Guangzhou, China; <sup>b</sup> Center for ADR Monitoring of  
12 Guangdong, Guangzhou, China; <sup>c</sup> Guangdong Provincial Key Laboratory of Food,  
13 Nutrition and Health, Guangzhou, China  
14

15 <sup>#</sup> These authors contributed equally to this work.  
16

17 **Address correspondence to** Ciyong Lu, Department of Medical Statistics and  
18 Epidemiology, School of Public Health, Sun Yat-sen University, Guangzhou, China  
19 #74, Zhongshan Road 2, Guangzhou 510080, P.R. China, E-mail address:  
20 luciyong@mail.sysu.edu.cn, (+86) 020-87332477  
21  
22

23  
24 **Abstract**

25 **Objectives:** Suicidality among sexual minority adolescents have generated worldwide  
26 concern in recent decades, and previous Western studies have demonstrated that  
27 sexual minority status is associated with adolescent suicidality. However, whether this  
28 association exists in Chinese adolescents remains largely unknown. This study aimed  
29 to estimate the associations between sexual minority status and suicidal behavior  
30 among Chinese adolescents.  
31

32 **Design:** Cross-sectional survey.

33 **Setting:** A total of 506 high schools in seven provinces of China.

34 **Participants:** A total of 150,822 students in grades 7-12 who completed the  
35 questionnaires (response rate of 95.9%) were included.

36 **Main outcome measures:** Suicidal ideation and suicide attempts were used to  
37 measure suicidal behavior, and sexual attraction (opposite-sex, same-sex, or both-sex)  
38 was used as a measure for sexual minority status.  
39

40 **Results:** Of the 150,822 adolescents analyzed, 4.1% self-reported as sexual minorities,  
41 and 17.3% were unsure. Compared to heterosexual and unsure adolescents, same-sex  
42 romantic attraction (SSA) and both-sex romantic attraction (BSA) adolescents  
43 reported a higher prevalence of past-year suicidal ideation (SSA: 21.6% for males and  
44 30.4% for females; BSA: 34.7% for males and 42.3% for females) and suicide  
45 attempts (SSA: 6.9% for males and 8.9% for females; BSA: 12.2% for males and 10.9%  
46 for females). After adjustment for covariates, SSA and BSA adolescents were more  
47 likely to have past-year suicidal ideation and suicide attempts than their heterosexual  
48 and unsure peers. BSA adolescents reported the highest risk of suicidal ideation  
49 (males: AOR=2.42, 95% CI=2.03-2.88; females: AOR=2.61, 95% CI=2.41-2.82) and  
50 suicide attempts (males: AOR=3.83, 95% CI: 2.85-5.14; females: AOR=2.59, 95% CI:  
51 2.19-3.06).  
52

53 **Conclusions:** Our study suggested that Chinese sexual minority adolescents were at  
54  
55  
56

1 increased risk of suicidality, and those with both-sex romantic attraction had an  
2 especially high risk in this population. These findings emphasized the urgent need to  
3 develop targeted interventions to effectively address suicide-related problems among  
4 Chinese sexual minority adolescents.

#### 5 6 **Strengths and limitations of this study:**

- 7 ● Our study estimated the prevalence of suicidality and examined the association  
8 between sexual minority status and suicidal behavior among Chinese adolescents.
- 9 ● A large-scale, nationally representative sample provided sufficient statistical  
10 power, and between-groups analyses were conducted.
- 11 ● Due to the nature of the cross-sectional data, interpretation of the direction of the  
12 observed associations is limited.
- 13 ● Our study sample included only students attending school and did not include  
14 adolescents who dropped out of school or were absent from school on the day the  
15 survey was administered.

16  
17 **Funding source:** This work was supported by the National Natural Science  
18 Foundation of China (Grant number 81673252) and the Natural Science Foundation  
19 of Guangdong Province, China (Grant number 2014A030313174).

20  
21 **Conflicting interests:** The authors have no conflicts of interest relevant to this article  
22 to disclose.

23  
24 **Ethics approval:** The study protocol was approved by the Institutional Review Board  
25 of Sun Yat-sen University, School of Public Health.

26  
27 **Data sharing statement:** No additional data are available.

## 28 29 **Introduction**

30 Suicidal behavior, which includes suicidal ideation, suicide attempts, and completed  
31 suicide, has raised concerns about the health of sexual minority adolescents (i.e.,  
32 adolescents who experience same-sex attraction, engage in same-sex sexual behavior,  
33 or self-identify as gay, lesbian, bisexual) in recent decades. Minority stress theory<sup>1</sup>  
34 suggests that difficulties in dealing with minority stressors (prejudice, discrimination,  
35 and stigma) associated with same-sex orientation may lead to substance abuse<sup>2</sup>,  
36 depression<sup>3</sup>, and even suicide<sup>4</sup> among sexual minorities. Compared with their

1  
2  
3  
4 1 heterosexual peers, sexual minority adolescents have been identified in numerous  
5  
6 2 studies as a high-risk group for suicidal behavior.<sup>5</sup> Regarding the associations of  
7  
8 3 sexual minority status with suicidal behavior, most related studies have been  
9  
10 4 conducted in Western or developed countries. Previous findings from the Youth Risk  
11  
12 5 Behavior Survey (YRBS) in the United States showed that approximately 42.8% and  
13  
14 6 29.4% of sexual minority adolescents reported having past-year suicidal ideation and  
15  
16 7 suicide attempts, respectively.<sup>6</sup> Two longitudinal studies from the United States and  
17  
18 8 Norway showed that sexual minority adolescents were twice and four times more  
19  
20 9 likely, respectively, to have attempted suicide in the past year than their heterosexual  
21  
22 10 peers.<sup>5,7</sup> Moreover, a previous systematic review indicated that bisexual individuals  
23  
24 11 from developed countries have the highest levels of suicide risk among sexual  
25  
26 12 minorities.<sup>8</sup> Those findings thus identified sexual minority status as a risk factor for  
27  
28 13 adolescent suicidality in Western or developed countries.

29  
30 14 As the largest developing country with a high suicide rate, China accounts for 21%  
31  
32 15 of the world's population and 30-40% of the world's suicides.<sup>9</sup> Although numerous  
33  
34 16 studies have focused on suicide risk in Chinese adolescents,<sup>10,11</sup> little attention has  
35  
36 17 been devoted to sexual minorities. Previous studies in China have shown that  
37  
38 18 4.6%-12.6% of gay adults have reported lifetime suicide attempts,<sup>12,13</sup> and sexual  
39  
40 19 minority youth from Taipei were almost twice as likely to have past-year suicidal  
41  
42 20 ideation as their heterosexual peers.<sup>14</sup> It is well known that the cultural background of  
43  
44 21 Western countries is different from that of Asian countries, especially China, where  
45  
46 22 Confucianism has been an influence for thousands of years and families and social  
47  
48  
49  
50  
51  
52  
53  
54  
55  
56  
57  
58  
59  
60

1 climates exert intense pressure on individuals to marry and have children to maintain  
2 their family lineages.<sup>15</sup> Thus, sexual minorities are recognized as a major impediment  
3 to continuing the family line and maintaining a family's reputation,<sup>16</sup> and sexual  
4 minorities in China may experience more minority stressors and higher levels of  
5 mental and behavioral problems.<sup>17,18</sup> However, there is a paucity of research exploring  
6 the associations between sexual minority status and suicidal behavior among  
7 mainland Chinese adolescents; whether this well-known increased suicide risk for  
8 sexual minorities can also be found in Chinese adolescents remains largely unknown.

9 Therefore, we conducted this nationally representative large-scale study to estimate  
10 the prevalence of suicidality among Chinese sexual minority adolescents, to evaluate  
11 the associations between sexual minority status and suicidal ideation and attempts, to  
12 investigate whether these associations vary in different sexual minority statuses, and  
13 to provide suggestions for effective policymaking and developing intervention  
14 strategies for governmental public health organizations.

## 16 **Methods**

### 17 *2.1 Study design and participants*

18 We utilized data from the 2015 School-Based Chinese Adolescents Health Survey  
19 (SCAHS),<sup>19,20</sup> an ongoing, large-scale health-related behavior survey among Chinese  
20 adolescents (grades 7-12). The SCAHS has been conducted every two years since  
21 2007, and the 2015 survey was the most recent version conducted in seven Chinese  
22 provinces.<sup>21</sup>

1  
2  
3  
4 1 In the 2015 SCAHS, students were selected via a 4-stage, stratified-cluster,  
5  
6 2 random-sampling method. In stage 1, all 34 province-level regions in China were  
7  
8 3 divided into four regional strata (East China, West China, South China, and North  
9  
10 4 China), and then two representative provinces from each regional stratum were  
11  
12 5 selected by simple randomization (only one province from East China). In stage 2,  
13  
14 6 cities in each representative province were divided into three economic strata  
15  
16 7 (high-level, middle-level, and low-level) by per capita GDP (gross domestic product).  
17  
18 8 Based on the proportions of these three types of cities, six cities were randomly  
19  
20 9 selected from each representative province. In stage 3, schools were divided into three  
21  
22 10 categories: junior high schools (i.e., grades 7-9), senior high schools (i.e., grades  
23  
24 11 10-12), and vocational high schools (i.e., grades 7-12). Based on the proportions of  
25  
26 12 these three types of schools, four junior high schools, four senior high schools, and  
27  
28 13 four vocational high schools were randomly selected from each representative city  
29  
30 14 (506 schools agreed to participate in this study). In stage 4, two classes were  
31  
32 15 randomly selected from each grade within the selected schools, and all available  
33  
34 16 students in the selected classes were invited to participate in this study voluntarily. In  
35  
36 17 total, 150,822 students completed the questionnaires (response rate of 95.9%).  
37  
38  
39  
40  
41  
42  
43  
44  
45  
46  
47

## 48 19 *2.2 Participants involvement and data collection*

49  
50 20 All students from the chosen classes were given a standardized self-administered  
51  
52 21 questionnaire which was developed by research team on the day of the survey, to be  
53  
54 22 completed in the classroom during a normal class period (40 or 45 minutes). To  
55  
56  
57  
58  
59  
60



1 protect student privacy, the questionnaire was completed by each student participant  
2 anonymously without the presence of teachers or other school personnel (to avoid any  
3 potential information bias). After collecting the questionnaires from students,  
4 investigators would check the questionnaires carefully and contact with the student  
5 timely when they found important missing data. The investigators were all trained and  
6 quality control was carried out during data collection. All data were collected from  
7 November 2014 to January 2015.

### 8 *2.3 Ethics statement*

9 This study was approved by the Sun Yat-Sen University School of Public Health  
10 Institutional Review Board. Written informed consent was obtained from each  
11 participating student who was at least 18 years old or from one of the student's  
12 parents (or legal guardian) if the student was under 18 years old.

### 13 *2.4 Measures*

#### 14 *2.4.1 Suicidal ideation and suicide attempts*

15 Suicidal ideation was defined as responding "1 or more times" to the following  
16 question: "During the past 12 months, how many times did you seriously consider  
17 attempting suicide?" Suicide attempts were assessed by asking students to respond to  
18 the following question with zero, once, or more: "During the past 12 months, how  
19 many times did you actually attempt suicide?"<sup>22,23</sup>

#### 20 *2.4.2 Sexual minority status*

21 The number of transsexuals among sexual minority adolescents is still very low<sup>24</sup> and  
22 was difficult to investigate in our school-based survey, and this minority group was

1 therefore not included in this study. Sexual minority status was measured by asking  
2 students the following question regarding sexual attraction: “In a romantic  
3 relationship, what kind of person are you attracted to?” Response options included the  
4 following: (1) opposite sex, (2) same sex, (3) equally opposite sex and same sex, and  
5 (4) unsure.<sup>25,26</sup> Respondents were classified as the following categories: (1)  
6 heterosexual, (2) same-sex romantic attraction (SSA), (3) both-sex romantic attraction  
7 (BSA), and (4) unsure. Students who belonged to categories (2) and (3) were  
8 classified as sexual minorities.

### 9 2.4.3 Demographic variables

10 Factors previously reported to be associated with suicidal behavior in sexual minority  
11 adolescents were taken into consideration.<sup>4,5,27</sup> Demographic variables included sex,  
12 age, academic pressure, household socioeconomic status (HSS), current smoking,  
13 current drinking, and bullying experience.

14 After reading a brief definition of bullying from the Olweus Bully/Victim  
15 Questionnaire, adolescents were asked the following question: “How often have you  
16 been bullied (kicked, intentionally excluded from participating, made fun of with  
17 sexual jokes, etc.) at school in the past 30 days?”<sup>28</sup> Answers were given on a 3-point  
18 scale as follows: (1) never, (2) sometimes or rarely (one or two times), or (3) often  
19 (more than three times). Students reporting a frequency of “often” in the past 30 days  
20 were classified as being bullied.<sup>29</sup> Academic pressure was assessed based on students’  
21 self-rating about their school work; responses were coded as follows: (1) none, (2)  
22 less, or (3) medium or great. HSS was measured by asking about the student’s

1 perception of his or her household's current socioeconomic status; responses were  
2 coded as follows: (1) very good, (2) good, and (3) fair or poor. Current smoking was  
3 measured by asking the following question: "During the past 30 days, on how many  
4 days did you smoke cigarettes?" Students who selected answers indicating 1 or more  
5 days were classified as current smokers.<sup>30,31</sup> Current drinking was assessed with the  
6 following question: "During the past 30 days, on how many days did you drink  
7 alcohol?" Students who selected answers indicating 1 or more days were classified as  
8 current drinkers.<sup>32</sup>

### 9 *2.5 Statistical analysis*

10 Prevalence estimates and logistic regression analyses used appropriate sampling  
11 weights (adjusting for students' grade, sex, and school location) and estimation  
12 procedures that accounted for the complex sampling design. Taylor series estimation  
13 methods were utilized to obtain proper standard error estimates. First, descriptive  
14 analyses were conducted to describe the demographic characteristics and prevalence  
15 of suicidality. Second, Rao-Scott chi-square tests and one-way ANOVA were used to  
16 compare the differences in demographic characteristics and suicide rates between  
17 groups. Third, univariate logistic regression models were performed to explore the  
18 associations between sexual minority status and suicidal ideation and suicide attempts  
19 without the confounding effects of sex. Additional multivariate models were  
20 sequentially adjusted for age, academic pressure, HSS, current smoking, current  
21 drinking, and bullying experience. Based on previously reported studies,<sup>33,34</sup> age,  
22 socio-family environment (e.g., academic pressure and HSS), unhealthy behaviors

1 (e.g., smoking and drinking), and school environment (e.g., bullying experience) were associated with suicidal behaviors in China, and all were added as covariates to determine the independent associations between sexual minority status and suicidality. Missing data accounted for less than 3.1% for all relevant variables and were eliminated from the statistical analysis. OR (odds ratios) and 95% CI (confidence intervals) were obtained from logistic regression models. *P*-values less than 0.05 were considered statistically significant (tested 2-sided) for regression analysis. The alpha level for paired comparison was set by Bonferroni correction. All statistical analyses were conducted using SAS 9.4 (SAS Institute, Inc., Cary, NC, USA).

## 11 **Results**

### 12 *3.1 Demographic characteristics*

13 The characteristics of the students are shown in **Table 1**. Of the total sample, the mean (SE) age of the adolescents was 15.1 (0.4) years old; 51.8% were males, and 48.2% were females. Among these adolescents, 4.1% self-reported as sexual minorities, 17.3% as unsure, and 78.6% as heterosexual. Compared with their unsure and heterosexual peers, sexual minority adolescents were more likely to be females ( $P<0.001$ ), to come from a family with poor socioeconomic status ( $P<0.001$ ), and to report medium or great academic pressure ( $P<0.001$ ). Additionally, sexual minority adolescents were also more likely to report smoking, alcohol use, and school bullying experiences during the past 30 days than their unsure and heterosexual peers.

### 22 *3.2 Prevalence of suicidality by sexual minority status*

1  
2  
3  
4 1 As shown in **Table 2**, for male adolescents, the weighted prevalence of past-year  
5  
6 2 suicidal ideation was more frequently reported in sexual minority (SSA: 21.6%; BSA:  
7  
8 3 34.7%) adolescents than in their heterosexual (14.50%) and unsure (11.7%) peers, and  
9  
10 4 BSA students reported the highest rate of past-year suicidal ideation. The weighted  
11  
12 5 prevalence of past-year suicide attempts was higher in sexual minority (SSA: 6.9%;  
13  
14 6 BSA: 12.2%) and unsure (3.1%) adolescents than in their heterosexual peers (2.2%),  
15  
16 7 and BSA students reported the highest rate of past-year suicide attempts.

17  
18  
19  
20 8 As for female adolescents, the weighted prevalence of past-year suicidal ideation  
21  
22 9 was higher in sexual minority (SSA: 30.4%; BSA: 42.3%) adolescents than in their  
23  
24 10 heterosexual (18.8%) and unsure (14.9%) peers, with BSA students having the highest  
25  
26 11 prevalence. The weighted prevalence of past-year suicide attempts was higher in  
27  
28 12 sexual minority adolescents (SSA: 8.9%; BSA: 10.9%) than in their heterosexual  
29  
30 13 (3.1%) and unsure (3.2%) peers, and BSA adolescents reported the highest rate of  
31  
32 14 past-year suicide attempts.

### 33 15 *3.3 Associations between sexual minority status and suicidal ideation and suicide* 34 35 16 *attempts*

36  
37  
38 17 As shown in **Table 3**, for male adolescents, unadjusted analyses (model 1) showed  
39  
40 18 that SSA and BSA adolescents had a higher risk of suicidal ideation and suicide  
41  
42 19 attempts than their heterosexual peers. After adjustment for academic pressure, HSS,  
43  
44 20 current smoking, current drinking, and bullying experience (model 2), SSA  
45  
46 21 (AOR=1.56, 95% CI: 1.26-1.94) and BSA (AOR=2.42, 95% CI: 2.03-2.88)  
47  
48 22 adolescents were more likely to report suicidal ideation than their heterosexual and  
49  
50  
51  
52  
53  
54  
55  
56

1  
2  
3  
4 1 unsure peers. Compared with heterosexual peers, SSA (AOR=3.13, 95% CI:  
5  
6 2.28-4.28), BSA (AOR=3.83, 95% CI: 2.85-5.14), and unsure (AOR=1.55, 95% CI:  
7  
8 1.24-1.94) male adolescents were more likely to have suicide attempts.  
9

10  
11 4 As for female adolescents, unadjusted analyses (model 1) showed that SSA and  
12  
13 5 BSA adolescents had a higher risk of suicidal ideation and suicide attempts than their  
14  
15 6 heterosexual and unsure peers. After adjustment for academic pressure, HSS, current  
16  
17 7 smoking, current drinking, and bullying experience (model 2). SSA (AOR=1.42, 95%  
18  
19 8 CI: 1.30-1.56) and BSA (AOR=2.61, 95% CI: 2.41-2.82) adolescents were more  
20  
21 9 likely to report suicidal ideation than their heterosexual and unsure peers. Compared  
22  
23 10 with heterosexual and unsure peers, SSA (AOR=1.97, 95% CI: 1.43-2.70) and BSA  
24  
25 11 (AOR=2.59, 95% CI: 2.19-3.06) female students were more likely to have suicide  
26  
27 12 attempts.  
28  
29  
30  
31

32  
33 13 Moreover, in both male and female adolescent sexual minorities, differences in the  
34  
35 14 risk of suicide attempts were more pronounced than differences in the risk of suicidal  
36  
37 15 ideation compared with those in heterosexual and unsure peers, and BSA adolescents  
38  
39 16 reported the highest risk of suicide attempts.  
40  
41  
42  
43  
44

## 45 18 **Discussion**

46  
47 19 As in many studies in Western or developed countries, we determined that Chinese  
48  
49 20 sexual minority adolescents had a higher risk of suicidal ideation and suicide attempts  
50  
51 21 than their heterosexual and unsure peers; being a BSA male or female was associated  
52  
53 22 with an increased risk of suicidality. To our knowledge, this study is the first to utilize  
54  
55  
56  
57  
58  
59  
60

1 nationally representative data to explore the associations between sexual minority  
2 status and suicidal behavior among Chinese adolescents.

3 Consistent with previous studies,<sup>4-6</sup> our results additionally revealed that sexual  
4 minority adolescents had a higher prevalence of both suicidal ideation and suicide  
5 attempts than their heterosexual peers. Compared with a cross-sectional survey  
6 conducted with sexual minority youths from three Asian cities (Hanoi, Shanghai, and  
7 Taipei),<sup>14</sup> the prevalence of past-year suicidal ideation and suicide attempts in our  
8 sexual minority samples was similar to that in Taipei samples but higher than that in  
9 Shanghai and Hanoi samples. This variation in results may derive from the different  
10 sample sources and age structures. Our findings provide population-based evidence of  
11 the prevalence of suicidal behavior among Chinese sexual minorities, which is useful  
12 for identifying adolescents who may be at high risk of suicide.

13 Furthermore, we found that, compared with their heterosexual peers, Chinese  
14 sexual minority adolescents had increased risk of suicidality after stratification by sex.  
15 To our knowledge, because of their insufficient sample sizes, most previous studies  
16 combined individuals with different sexual minority statuses into one category  
17 without considering sex stratification, which may obscure the estimates of suicide risk  
18 among high-risk adolescents.<sup>35,36</sup> This study is the first to utilize a nationally  
19 representative and large-scale sample to explore the associations between sexual  
20 minority status and suicidal behavior among Chinese adolescents grouped according  
21 to sexual minority status and stratified by sex. Our results are consistent with a  
22 previous systematic review that reported elevated risks of past-year suicide attempts

1  
2  
3  
4 1 in homosexual and bisexual adolescents, especially males.<sup>37</sup> One possible mechanism  
5  
6 2 to explain these associations is the experience of minority stress.<sup>1</sup> According to the  
7  
8 3 minority stress model, sexual minority individuals may experience minority stressors  
9  
10 4 (e.g., prejudice events, internalized homophobia), which are related to lower  
11  
12 5 well-being and higher levels of suicidal ideation.<sup>38</sup> Previous results from a 2011  
13  
14 6 National School Climate Survey indicated that more than 60-80% of sexual minority  
15  
16 7 students reported being verbally harassed and that 40% of students experienced  
17  
18 8 physical violence at school during the past year.<sup>39</sup> Experiences such as being  
19  
20 9 threatened or injured are directly related to suicidality among sexual minority  
21  
22 10 adolescents.<sup>40</sup> In current Chinese society, stigma against nonheterosexual individuals  
23  
24 11 persists, and a large portion of the general population shows intolerant attitudes  
25  
26 12 toward sexual minorities.<sup>41</sup> In our study, we also found that Chinese sexual minorities  
27  
28 13 have a higher prevalence of bullying experiences than their heterosexual peers.  
29  
30 14 Therefore, a negative school environment may play a potential role in the associations  
31  
32 15 between sexual minority status and suicidal behavior among Chinese adolescents.

33  
34  
35  
36  
37  
38  
39  
40 16 In line with previous studies,<sup>37,42</sup> our study found that sexual orientation-associated  
41  
42 17 differences were more pronounced for suicide attempts than for suicidal ideation, and  
43  
44 18 BSA adolescents showed a higher risk of suicide attempts than their SSA, unsure, and  
45  
46 19 heterosexual peers. Several reasons may explain the more severe forms of suicidality  
47  
48 20 among the bisexual group. First, bisexual individuals may experience additional forms  
49  
50 21 of minority stress from both gays/lesbians and heterosexuals, and the various forms of  
51  
52 22 biphobia and monosexism can create emotional and cognitive dysfunction that may  
53  
54  
55  
56  
57  
58  
59  
60



1  
2  
3 lead to depression, anxiety, or even suicide attempts.<sup>1,43</sup> Second, bisexual individuals  
4  
5 are pervasively invisible in society. Heterosexual and homosexual people have mutual  
6  
7 interests in maintaining the primacy of monosexual assumptions and binary sexual  
8  
9 orientation, which may contribute to an internalized sense of belief that bisexuals do  
10  
11 not belong to any particular sexual minority group. The lack of a sense of belonging  
12  
13 may be one of the factors contributing to suicide attempts among bisexual people.<sup>8,43</sup>  
14  
15 Third, lack of social and healthcare support was more commonly reported among  
16  
17 bisexual individuals than among their homosexual and heterosexual peers, and this  
18  
19 lack of support made bisexuals feel more socially isolated and vulnerable to chronic  
20  
21 stress and led to an increased risk of suicide.<sup>44</sup> Moreover, our results reported that  
22  
23 17.3% of adolescents reported being unsure about sexual romantic attraction, which is  
24  
25 higher than that reported in previous Western research.<sup>45</sup> One potential explanation is  
26  
27 that the unsure category may include many adolescents who did not understand the  
28  
29 question about sexual minority status or were unwilling to disclose their sexual  
30  
31 orientation. In accordance with a previous systematic review,<sup>37</sup> the risk of past-year  
32  
33 suicide attempts was smaller for unsure adolescents than for sexual minorities in our  
34  
35 study. However, previous studies reported that unsure adolescents may show  
36  
37 same-sex attraction or behaviors<sup>46</sup> and thus may experience minority stress (e.g.,  
38  
39 bullying victimization),<sup>47</sup> leading to health disparities such as depression, anxiety,<sup>48</sup>  
40  
41 and suicidal ideation.<sup>49</sup> In contrast to previous studies, our findings showed that  
42  
43 unsure adolescents had no increased risk of suicidal ideation compared to  
44  
45 heterosexual peers. One possible reason explaining the discrepant findings could be  
46  
47  
48  
49  
50  
51  
52  
53  
54  
55  
56  
57  
58  
59  
60

1 the much larger proportion of unsure adolescents in our Chinese sample. Therefore,  
2 further research to explore the prevalence and mechanisms of suicidality among  
3 unsure adolescents is needed.

4 Chinese sexual minorities suffer from minority stressors due to discrimination,  
5 homophobia and other conditions in the social environment impacted by traditional  
6 Chinese culture (which is rooted in Confucian philosophies).<sup>50</sup> Confucianism  
7 emphasizes the continuation of the family line and filial piety to protect the family's  
8 reputation and lineage (e.g., prior to 2016, the One-Child Policy; from 2016 to the  
9 present, the Two-Child Policy).<sup>16</sup> Although attitudes toward Chinese sexual minorities  
10 have become more positive in particular populations (e.g., younger or highly educated  
11 people),<sup>51</sup> a large proportion of the Chinese population still holds negative attitudes  
12 toward sexual minorities. Same-sex orientation is still considered to conflict with  
13 traditional values and associated with prejudice and stigma in the current Chinese  
14 social context.<sup>52</sup> These negative attitudes toward sexual minorities and minority  
15 stressors that they experience have been linked to high levels of mental and  
16 behavioral problems, such as depression and suicide attempts.<sup>17,18</sup> In this study, our  
17 findings suggested that sexual minority status was associated with suicidal behavior  
18 among Chinese adolescents and that BSA individuals were the highest-risk group in  
19 this population. Therefore, the following appropriate interventions for suicidality  
20 among Chinese sexual minority adolescents are recommended. First, government and  
21 policy makers should establish a set of nationwide policies and programs to provide a  
22 significant source of support for sexual minorities and to reduce the homophobia

1  
2  
3  
4 1 arising from societal/structural homophobia and rigid gender roles. Second, schools  
5  
6 2 and related public health organizations should formulate policies to prevent students  
7  
8 3 from experiencing minority stressors (e.g., being bullied at school) to reduce  
9  
10 4 discrimination and create a generally positive school climate. Third, online resources  
11  
12 5 (e.g., online sex education websites) should be integrated to provide more relevant  
13  
14 6 information and education, which may help to foster a more tolerant and open  
15  
16 7 atmosphere toward sexual minorities. Fourth, families and communities should  
17  
18 8 provide social support (e.g., Gay-Straight Alliance groups, and Parents and Friends of  
19  
20 9 Lesbians and Gays) to promote acceptance of sexual minority orientation<sup>53</sup> and reduce  
21  
22 10 pressure from traditional values and norms embedded in Confucianism (e.g., filial  
23  
24 11 piety and family responsibilities).<sup>51</sup> Fifth, practitioners (e.g., psychologists,  
25  
26 12 psychiatrists, counselors, and social workers) should specifically focus on the group  
27  
28 13 that is at particularly high risk of suicidality (i.e., BSA adolescents) with a weaker  
29  
30 14 collective identity. Developing early and effective suicide-related preventive  
31  
32 15 interventions (e.g., treatment of depression, anxiety, and their comorbidities)<sup>13</sup> can  
33  
34 16 help improve mental well-being in high-risk sexual minority adolescents.

35  
36  
37  
38  
39  
40  
41  
42 17 Some noteworthy limitations should be considered when interpreting the results of  
43  
44 18 this study. First, due to the cross-sectional design, it is difficult to make causal  
45  
46 19 inferences. Second, our study used a structured self-rating questionnaire to collect  
47  
48 20 data. Although self-reporting is a common and accepted method in sexuality research  
49  
50 21 on adolescents, we could not completely rule out the possibility of recall bias and  
51  
52 22 misclassification bias. Third, our study sample included only students attending  
53  
54  
55  
56  
57  
58  
59  
60

1 school and did not include adolescents who dropped out of school or were absent  
2 from school on the day the survey was administered; suicidality may be more  
3 common among sexual minority students who were absent, possibly leading to  
4 underestimation of the sexual orientation disparities in our study. Fourth, we used the  
5 item on same-sex romantic attraction to measure sexual minority status, and the  
6 results might not be comparable to those in other studies using sexual orientation as a  
7 measurement. However, our measure is particularly appropriate for surveying the  
8 health of sexual minority adolescents<sup>45</sup> and is more likely to capture a broad range of  
9 adolescents who have “come out” or acknowledged romantic attraction but may not  
10 have adopted a homosexual identity,<sup>5</sup> which may help to identify that high-risk  
11 population. Fifth, gender dysphoria/transgender status was not measured in our study  
12 because sexual minority status was assumed using a binary definition of sex; although  
13 this way of definition is common in current scientific practice, we were unable to  
14 evaluate the experiences of suicidality in this minority group. Despite these  
15 limitations, the primary strengths of our study includes its nationally representative  
16 and large-scale sample of Chinese adolescents, providing sufficient statistical power  
17 and potentially avoiding over-sampling of the sexual minority population.  
18 Furthermore, to the best of our knowledge, our study is the first study investigating  
19 the risk for suicidal behavior among Chinese sexual minority adolescents in a  
20 representative sample.

## 22 **Conclusions**

1  
2  
3 1 Increased suicide risk among sexual minority adolescents has become a major global  
4  
5  
6 2 health concern. However, few related studies have been conducted among Chinese  
7  
8  
9 3 adolescents. The findings from our study suggested that Chinese sexual minority  
10  
11 4 adolescents had a higher risk of suicidal behavior and that BSA adolescents have the  
12  
13 5 highest risk of suicidality regardless of sex. Based on our study results, conducting  
14  
15 6 early detection and intervention programs for Chinese sexual minorities (especially  
16  
17 7 BSA individuals) is suggested to more effectively and appropriately prevent  
18  
19 8 suicide-related problems. Future studies that focus on the risk factors, mechanisms  
20  
21 9 and interventions of suicidal behavior in Chinese sexual minority adolescents are  
22  
23  
24  
25 10 warranted.

26  
27  
28 11

#### 12 **Contributors' Statement:**

13 Ciyong Lu conceptualized and designed the study, reviewed and revised the  
14 manuscript and approved the final manuscript as submitted. Yeen Huang and  
15 Pengsheng Li conceptualized and designed the study, coordinated and supervised the  
16 data collection, carried out the initial analyses, drafted the initial manuscript, and  
17 approved the final manuscript as submitted. They contributed equally to this study.  
18 Lan Guo carried out the analyses and interpreted the data, reviewed and revised the  
19 manuscript and approved the final manuscript as submitted. Xue Gao, Yan Xu,  
20 Guoliang Huang, and Xueqing Deng designed the data collection instruments,  
21 coordinated and supervised the data collection, reviewed and revised the manuscript,  
22 and approved the final manuscript as submitted. All authors approved the final  
23 manuscript as submitted and agree to be accountable for all aspects of the work.

24  
25 **Acknowledgments:** The authors would like to thank local health professionals, the  
26 Department of Education, and participating schools for their assistance and support.  
27 In addition, we express our gratitude to all the participants and investigators for  
28 assistance in data collection.

#### 29 30 **References:**

- 31 1. Meyer IH. Prejudice, social stress, and mental health in lesbian, gay, and  
32 bisexual populations: conceptual issues and research evidence. *Psychol Bull*  
33 2003;129:674-697.

- 1 2. Marshal M P, Friedman M S, Stall R, et al. Sexual orientation and adolescent  
2 substance use: a meta-analysis and methodological review. *Addiction*  
3 2008;103:546-556.
- 4 3. Marshal M P, Dietz L J, Friedman M S, et al. Suicidality and depression  
5 disparities between sexual minority and heterosexual youth: a meta-analytic  
6 review. *J Adolesc Health* 2011;49:115-123.
- 7 4. Remafedi G, French SA, Story M, et al. The relationship between suicide risk  
8 and sexual orientation: results of a population-based study. *Am J Public Health*  
9 1998;88:57-60.
- 10 5. Russell ST, Joyner K. Adolescent sexual orientation and suicide risk: evidence  
11 from a national study. *Am J Public Health* 2001;91:1276-1281.
- 12 6. Kann L, Olsen EO, Mcmanus T, et al. Sexual identity, sex of sexual contacts,  
13 and health-risk behaviors among students in grades 9-12 —United States and  
14 selected Sites, 2015. *MMWR Surveill Summ* (Washington, D.C.: 2002)  
15 2016;65:19-20.
- 16 7. Wichstrøm L, Hegna K. Sexual orientation and suicide attempt: a longitudinal  
17 study of the general Norwegian adolescent population. *J Abnorm Psychol*  
18 2003;112:144-151.
- 19 8. Salway T, Ross L E, Fehr C P, et al. A systematic review and meta-analysis of  
20 disparities in the prevalence of suicide ideation and attempt among bisexual  
21 populations. *Arch Sex Behav*, 2018:1-23.
- 22 9. Phillips MR, Li X, Zhang Y, et al. Suicide rates in China, 1995-99. *The Lancet*  
23 2002;359:835-840.
- 24 10. Liu X C, Chen H, Liu Z Z, et al. Prevalence of suicidal behaviour and associated  
25 factors in a large sample of Chinese adolescents. *Epidemiol Psychiatr Sci*  
26 2017:1-10.
- 27 11. Guo L, Xu Y, Deng J, et al. Association between sleep duration, suicidal  
28 ideation, and suicidal attempts among Chinese adolescents: The moderating role  
29 of depressive symptoms. *J Affect Disord* 2017;208:355-362.
- 30 12. Chen H, Li Y, Wang L, et al. Causes of suicidal behaviors in men who have sex  
31 with men in China: a national questionnaire survey. *BMC Public Health*  
32 2015;15:1-4.
- 33 13. Mu H, Li Y, Li L, et al. Prevalence and risk factors for lifetime suicide ideation,  
34 plan and attempt in Chinese men who have sex with men. *BMC Psychiatry*  
35 2016;16:1-10.
- 36 14. Lian Q, Zuo X, Lou C, et al. Sexual orientation and risk factors for suicidal  
37 ideation and suicide attempts: a multi-centre cross-sectional study in three Asian  
38 cities. *J Epidemiol* 2015;25:155-161.
- 39 15. Zhan H J, Montgomery R J V. Gender and elder care in China: The influence of  
40 filial piety and structural constraints. *Gender & Society* 2003;17:209-229.
- 41 16. Hsu M H, Waters J A. Filial Piety and sexual prejudice in Chinese culture.  
42 *Attitude Measures* 2001;11.
- 43 17. Feng Y, Wu Z, Detels R. Evolution of men who have sex with men community  
44 and experienced stigma among men who have sex with men in Chengdu, China.

- 1  
2  
3 1 J Acquir Immune Defic Syndr 2010;53:98-103.
- 4 2 18. Liu J X, Choi K. Experiences of social discrimination among Men Who Have  
5 3 Sex with Men in Shanghai, China. *AIDS Behav* 2006;10:25-33.
- 6 4 19. Wang H, Deng J, Zhou X, et al. The nonmedical use of prescription medicines  
7 5 among high school students: A cross-sectional study in Southern China. *Drug*  
8 6 *Alcohol Depend* 2014;141:9-15.
- 9 7 20. Guo L, Xu Y, Deng J, et al. Non-medical use of prescription pain relievers  
10 8 among high school students in China: a multilevel analysis. *BMJ Open*  
11 9 2015;5:e007569.
- 12 10 21. Guo L, Xu Y, Deng J, et al. Associations between childhood maltreatment and  
13 11 non-medical use of prescription drugs among Chinese adolescents. *Addiction*  
14 12 2017;112:1600-1609.
- 15 13 22. Guo L, Xu Y, Deng J, et al. Association between nonmedical use of prescription  
16 14 drugs and suicidal behavior among adolescents. *JAMA Pediatr*  
17 15 2016;170:971-978.
- 18 16 23. Woods ER, Lin YG, Middleman AB, et al. The associations of suicide attempts  
19 17 in adolescents. *Pediatrics* 1997;99:791-796.
- 20 18 24. Arcelus J, Bouman W P, Noortgate W V D, et al. Systematic review and  
21 19 meta-analysis of prevalence studies in transsexualism. *Eur Psychiatry*  
22 20 2015;30:807-815.
- 23 21 25. Lesbian, Gay, and Bisexual (LGB) Youth Sexual Orientation Measurement  
24 22 Work Group. Measuring sexual orientation of young people in health research.  
25 23 San Francisco, CA: Gay and Lesbian Medical Association 2003.
- 26 24 26. Li P, Huang Y, Guo L, et al. Sexual attraction and the nonmedical use of opioids  
27 25 and sedative drugs among Chinese adolescents. *Drug Alcohol Depend*  
28 26 2018;183:169-175.
- 29 27 27. Shields JP, Whitaker K, Glassman J, et al. Impact of victimization on risk of  
30 28 suicide among lesbian, gay, and bisexual high school students in San Francisco.  
31 29 *J Adolesc Health* 2012;50:418-420.
- 32 30 28. Olweus D. The revised Olweus bully/victim questionnaire. Bergen, Norway:  
33 31 University of Bergen 1996.
- 34 32 29. Wu J, He Y, Lu C, et al. Bullying behaviors among Chinese school-aged youth:  
35 33 A prevalence and correlates study in Guangdong province. *Psychiatry Res*  
36 34 2015;225:716-722.
- 37 35 30. Acierno R, Kilpatrick DG, Resnick HS, et al. Assault, PTSD, family substance  
38 36 use, and depression as risk factors for cigarette use in youth: findings from the  
39 37 National Survey of Adolescents. *J Trauma Stress* 2000;13:381-396.
- 40 38 31. Kandra KL, Mccullough A, Ranney L, et al. Support among middle school and  
41 39 high school students for smoke-free policies, North Carolina, 2009. *Prev*  
42 40 *Chronic Dis* 2013;10:675-681.
- 43 41 32. Huang R, Ho SY, Wang MP, et al. Sociodemographic risk factors of alcohol  
44 42 drinking in Hong Kong adolescents. *J Epidemiol Community Health*  
45 43 2016;70:374-379.
- 46 44 33. Li Y, Li YF, Cao J, et al. Factors associated with suicidal behaviors in mainland



- 1  
2  
3 1 China: a meta-analysis. *BMC Public Health* 2012;12:1-13.
- 4 2 34. Dai J, Chiu HF, Conner K R, et al. Suicidal ideation and attempts among rural  
5 3 Chinese aged 16-34 years--Socio-demographic correlates in the context of a  
6 4 transforming China. *J Affect Disord* 2011;130:438-446.
- 7 5 35. Swannell S, Martin G, Page A. Suicidal ideation, suicide attempts and  
8 6 non-suicidal self-injury among lesbian, gay, bisexual and heterosexual adults:  
9 7 Findings from an Australian national study. *Aust N Z J Psychiatry*  
10 8 2016;50:145-153.
- 11 9 36. Graaf RD, Sandfort TG, Have MT. Suicidality and sexual orientation:  
12 10 differences between men and women in a general population-based sample from  
13 11 the Netherlands. *Arch Sex Behav* 2006;35:253-262.
- 14 12 37. Plöderl M, Tremblay P. Mental health of sexual minorities. A systematic review.  
15 13 *Int Rev Psychiatry* 2015;27:367-385.
- 16 14 38. Baams L, Grossman AH, Russell ST, et al. Minority stress and mechanisms of  
17 15 risk for depression and suicidal ideation among lesbian, gay, and bisexual youth.  
18 16 *Dev Psychol* 2015;51:688-696.
- 19 17 39. Kosciw JG, Greytak EA, Bartkiewicz MJ, et al. The 2011 National School  
20 18 Climate Survey: The experiences of lesbian, gay, bisexual and transgender youth  
21 19 in our nation's schools. New York: GLSEN 2012.
- 22 20 40. Bontempo DE, Augelli AR. Effects of at-school victimization and sexual  
23 21 orientation on lesbian, gay, or bisexual youths' health risk behavior. *J Adolesc*  
24 22 *Health* 2002;30:364-374.
- 25 23 41. Kwok DK, Wu J. Chinese attitudes towards sexual minorities in Hong Kong:  
26 24 Implications for mental health. *Int Rev Psychiatry* 2015;27:444-454.
- 27 25 42. Pompili M, Lester D, Forte A, et al. Bisexuality and suicide: a systematic review  
28 26 of the current literature. *J Sex Med* 2014;11:1903-1913.
- 29 27 43. Hatzenbuehler M L. How does sexual minority stigma "Get Under the Skin"? a  
30 28 psychological mediation framework. *Psychol Bull* 2009;135:707-730.
- 31 29 44. Koh AS, Ross LK. Mental health issues: A comparison of lesbian, bisexual and  
32 30 heterosexual women. *J Homosex* 2006;51:33-57.
- 33 31 45. Kann L, Olsen E O, Mcmanus T, et al. Sexual identity, sex of sexual contacts,  
34 32 and health-risk behaviors among students in grades 9-12--youth risk behavior  
35 33 surveillance, selected sites, United States, 2001-2009. *MMWR Surveill Summ*  
36 34 2011;60:1-133.
- 37 35 46. Igartua K, Thombs B D, Burgos G, et al. Concordance and discrepancy in sexual  
38 36 identity, attraction, and behavior among adolescents. *J Adolesc Health*  
39 37 2009;45:602-608.
- 40 38 47. Birkett M, Russell S T, Corliss H L. Sexual-orientation disparities in school: the  
41 39 mediational role of indicators of victimization in achievement and truancy  
42 40 because of feeling unsafe. *Am J Public Health* 2014;104:1124-1128.
- 43 41 48. Sara B. Oswalt MPH PhD, Tammy J. Wyatt PhD. Sexual orientation and  
44 42 differences in mental health, stress, and academic performance in a national  
45 43 sample of U.S. College Students. *J Homosex* 2011;58:1255-1280.
- 46 44 49. Zhao Y, Montoro R, Igartua K, et al. Suicidal ideation and attempt among



- 1  
2  
3 1 adolescents reporting "unsure" sexual identity or heterosexual identity plus  
4 2 same-sex attraction or behavior: forgotten groups?. *J Am Acad Child Adolesc*  
5 3 *Psychiatry* 2010;49:104-113.  
6 4  
7 50. Kwok D K. School experience of Chinese sexual minority students in Hong  
8 5 Kong. *J Lgbt Youth* 2016;13:378-396.  
9 6  
10 51. Chi X, Hawk S T. Attitudes toward same-sex attraction and behavior among  
11 7 Chinese university students: tendencies, correlates, and gender differences.  
12 8 *Front Psychol* 2016;7:1-9.  
13 9  
14 52. Lin K, Button D M, Su M, et al. Chinese college students' attitudes toward  
15 10 homosexuality: exploring the effects of traditional culture and modernizing  
16 11 factors. *Sex Res Social Policy* 2016;13:158-172.  
17 12  
18 53. Whitaker K, Shapiro VB, Shields JP, et al. School-based protective factors  
19 13 related to suicide for lesbian, gay, and bisexual adolescents. *J Adolesc Health*  
20 14 2016;58:63-68.  
21 15

**Table 1. Demographic characteristics of participants by sexual minority status among Chinese adolescents (N=150,822).**

| Variable                      | Total<br>No. (%) | Heterosexual<br>No. (%) | Sexual minorities <sup>a</sup><br>No. (%) | Unsure<br>No. (%) | $\chi^2/F$ | P-value |
|-------------------------------|------------------|-------------------------|-------------------------------------------|-------------------|------------|---------|
| <b>Total</b>                  | 150,822 (100.00) | 116,774 (78.6)          | 6,685 (4.1)                               | 27,363 (17.3)     |            |         |
| <b>Sex</b>                    |                  |                         |                                           |                   | 182.90     | <0.001  |
| <b>Male</b>                   | 72,409 (51.8)    | 57,343 (52.8)           | 2,483 (41.4)                              | 12,583 (49.7)     |            |         |
| <b>Female</b>                 | 78,413 (48.2)    | 59,431 (47.2)           | 4,202 (58.6)                              | 14,780 (50.3)     |            |         |
| <b>Age (year)<sup>b</sup></b> | 15.1 (0.4)       | 15.3 (0.5)              | 15.1 (0.4)                                | 14.1 (0.3)        | 754.33     | <0.001  |
| <b>Academic pressure</b>      |                  |                         |                                           |                   | 567.69     | <0.001  |
| <b>None</b>                   | 23,387 (15.8)    | 17,051 (14.9)           | 1,060 (16.1)                              | 5,276 (19.8)      |            |         |
| <b>Less</b>                   | 69,359 (46.5)    | 53,061 (46.1)           | 2,648 (39.9)                              | 13,650 (49.8)     |            |         |
| <b>Medium or great</b>        | 58,076 (37.7)    | 46,662 (39.0)           | 2,977 (44.0)                              | 8,437 (30.4)      |            |         |
| <b>HSS<sup>c</sup></b>        |                  |                         |                                           |                   | 204.56     | <0.001  |
| <b>Very good</b>              | 30,766 (22.7)    | 22,812 (21.8)           | 1,456 (24.2)                              | 6,498 (26.6)      |            |         |
| <b>Good</b>                   | 90,894 (60.3)    | 71,306 (61.1)           | 3,748 (55.4)                              | 15,840 (57.4)     |            |         |
| <b>Fair or poor</b>           | 29,162 (17.0)    | 22,656 (17.1)           | 1,481 (20.4)                              | 5,025 (16.0)      |            |         |
| <b>Current smoking</b>        |                  |                         |                                           |                   | 288.12     | <0.001  |
| <b>No</b>                     | 143,032 (94.6)   | 110,194 (94.1)          | 6,212 (93.0)                              | 26,626 (97.3)     |            |         |
| <b>Yes</b>                    | 7,790 (5.4)      | 6,580 (5.9)             | 473 (7.0)                                 | 737 (2.7)         |            |         |
| <b>Current drinking</b>       |                  |                         |                                           |                   | 818.05     | <0.001  |
| <b>No</b>                     | 126,765 (84.0)   | 96,909 (82.9)           | 5,072 (76.6)                              | 24,784 (90.5)     |            |         |
| <b>Yes</b>                    | 24,057 (16.0)    | 19,865 (17.1)           | 1,613 (23.4)                              | 2,579 (9.5)       |            |         |
| <b>Bullying experience</b>    |                  |                         |                                           |                   | 57.58      | <0.001  |
| <b>No</b>                     | 138,523 (91.6)   | 107,767 (92.0)          | 5,668 (83.9)                              | 25,088 (91.3)     |            |         |
| <b>Yes</b>                    | 12,299 (8.4)     | 9,007 (8.0)             | 1,017 (16.1)                              | 2,275 (8.7)       |            |         |

<sup>a</sup>Sexual minorities included adolescents who reported same-sex or both-sex romantic attraction.

1  
2  
3  
4  
5  
6  
7 <sup>b</sup> Age data are presented as the means (SE).

8 <sup>c</sup> HSS, Household socioeconomic status.

9 All numbers were unweighted, whereas all percentages were adjusted for sampling weights.  
10  
11  
12  
13  
14  
15  
16  
17  
18  
19  
20  
21  
22  
23  
24  
25  
26  
27  
28  
29  
30  
31  
32  
33  
34  
35  
36  
37  
38  
39  
40  
41  
42  
43  
44  
45  
46  
47

For peer review only

Table 2. Prevalence of past-year suicidal ideation and suicide attempts by sexual minority status among Chinese adolescents (N=150,822).

|                          | Males (N=72,409) |            |              |               | Females (N=78,413) |            |              |               |
|--------------------------|------------------|------------|--------------|---------------|--------------------|------------|--------------|---------------|
|                          | Heterosexual=1   | SSA=2      | BSA=3        | Unsure=4      | Heterosexual=5     | SSA=6      | BSA=7        | Unsure=8      |
|                          | No. (%)          | No. (%)    | No. (%)      | No. (%)       | No. (%)            | No. (%)    | No. (%)      | No. (%)       |
| <b>Suicidal ideation</b> |                  |            |              |               |                    |            |              |               |
| <b>No</b>                | 48,572 (85.5)    | 795 (78.4) | 919 (65.3)   | 11,067 (88.3) | 47,941 (81.2)      | 706 (69.6) | 1,839 (57.7) | 12,527 (85.1) |
| <b>Yes</b>               | 8,771 (14.5)     | 243 (21.6) | 526 (34.7)   | 1,516 (11.7)  | 11,490 (18.8)      | 309 (30.4) | 1,348 (42.3) | 2,253 (14.9)  |
| <b>Suicide attempts</b>  |                  |            |              |               |                    |            |              |               |
| <b>No</b>                | 55,991 (97.8)    | 962 (93.1) | 1,267 (87.8) | 12,184 (96.9) | 57,552 (96.9)      | 923 (91.1) | 2,820 (89.1) | 14,318 (96.8) |
| <b>Yes</b>               | 1,352 (2.2)      | 76 (6.9)   | 178 (12.2)   | 399 (3.1)     | 1,879 (3.1)        | 92 (8.9)   | 367 (10.9)   | 462 (3.2)     |

SSA, same-sex romantic attraction; BSA, both-sex romantic attraction;

All numbers were unweighted, whereas all percentages were adjusted for sampling weights.

The alpha level for paired comparison was set at  $P=0.0083$  after Bonferroni correction.

**Paired comparison for suicidal ideation:**

2>1,  $\chi^2=51.42, P<0.001$ ;      6>5,  $\chi^2=78.41, P<0.001$ ;  
3>1,  $\chi^2=471.59, P<0.001$ ;      7>5,  $\chi^2=978.63, P<0.001$ ;  
3>2,  $\chi^2=47.69, P<0.001$ ;      7>6,  $\chi^2=45.29, P<0.001$ ;  
4<1,  $\chi^2=86.74, P<0.001$ ;      8<5,  $\chi^2=131.20, P<0.001$ ;  
4<2,  $\chi^2=110.08, P<0.001$ ;      8<6,  $\chi^2=161.47, P<0.001$ ;  
4<3,  $\chi^2=618.07, P<0.001$ ;      8<7,  $\chi^2=1197.33, P<0.001$ ;

**Paired comparison for suicide attempts:**

2>1,  $\chi^2=105.29, P<0.001$ ;      6>5,  $\chi^2=110.22, P<0.001$ ;  
3>1,  $\chi^2=551.67, P<0.001$ ;      7>5,  $\chi^2=610.42, P<0.001$ ;  
3>2,  $\chi^2=16.42, P<0.001$ ;      7>6,  $\chi^2=4.76, P=0.029$ ;  
4>1,  $\chi^2=27.95, P<0.001$ ;      8>5,  $\chi^2=0.05, P=0.824$ ;  
4<2,  $\chi^2=49.09, P<0.001$ ;      8<6,  $\chi^2=98.96, P<0.001$ ;  
4<3,  $\chi^2=274.99, P<0.001$ ;      8<7,  $\chi^2=419.29, P<0.001$ ;

**Table 3. Associations of sexual minority status with past-year suicidal ideation and suicide attempts among Chinese adolescents (N=150,822).**

|                          | Model 1 <sup>a</sup> |           |        | Model 2 <sup>b</sup> |           |        |
|--------------------------|----------------------|-----------|--------|----------------------|-----------|--------|
|                          | OR                   | 95% CI    | P      | AOR                  | 95% CI    | P      |
| <b>Suicidal ideation</b> |                      |           |        |                      |           |        |
| <b>Males</b>             |                      |           |        |                      |           |        |
| Heterosexual             | 1.0                  |           |        | 1.0                  |           |        |
| SSA                      | 1.62                 | 1.30-2.03 | <0.001 | 1.56                 | 1.26-1.94 | <0.001 |
| BSA                      | 3.13                 | 2.59-3.79 | <0.001 | 2.42                 | 2.03-2.88 | <0.001 |
| Unsure                   | 0.78                 | 0.67-0.91 | <0.001 | 0.78                 | 0.69-0.87 | <0.001 |
| <b>Females</b>           |                      |           |        |                      |           |        |
| Heterosexual             | 1.0                  |           |        | 1.0                  |           |        |
| SSA                      | 1.88                 | 1.67-2.11 | <0.001 | 1.42                 | 1.30-1.56 | <0.001 |
| BSA                      | 3.15                 | 2.93-3.39 | <0.001 | 2.61                 | 2.41-2.82 | <0.001 |
| Unsure                   | 0.75                 | 0.60-0.94 | <0.001 | 0.71                 | 0.61-0.83 | <0.001 |
| <b>Suicide attempts</b>  |                      |           |        |                      |           |        |
| <b>Males</b>             |                      |           |        |                      |           |        |
| Heterosexual             | 1.0                  |           |        | 1.0                  |           |        |
| SSA                      | 3.29                 | 2.43-4.47 | <0.001 | 3.13                 | 2.28-4.28 | <0.001 |
| BSA                      | 6.25                 | 4.46-8.76 | <0.001 | 3.83                 | 2.85-5.14 | <0.001 |
| Unsure                   | 1.42                 | 1.07-1.90 | <0.001 | 1.55                 | 1.24-1.94 | <0.001 |
| <b>Females</b>           |                      |           |        |                      |           |        |
| Heterosexual             | 1.0                  |           |        | 1.0                  |           |        |
| SSA                      | 3.13                 | 2.36-4.15 | <0.001 | 1.97                 | 1.43-2.70 | <0.001 |
| BSA                      | 3.89                 | 3.13-4.83 | <0.001 | 2.59                 | 2.19-3.06 | <0.001 |
| Unsure                   | 1.04                 | 0.75-1.44 | 0.824  | 1.03                 | 0.80-1.34 | 0.531  |

SSA, same-sex romantic attraction; BSA, both-sex romantic attraction; CI, confidence intervals; OR, odds ratios; AOR, adjusted odds ratios.

<sup>a</sup>Unadjusted.

<sup>b</sup>Adjusted for age, academic pressure, household socioeconomic status, current smoking, current drinking, and bullying experience.

## STROBE Statement—checklist of items that should be included in reports of observational studies

|                              | Item No | Recommendation                                                                                                                                                                                                                                                                                                                                                                                                                                                                                                                                                                                                                                                                                                                             |
|------------------------------|---------|--------------------------------------------------------------------------------------------------------------------------------------------------------------------------------------------------------------------------------------------------------------------------------------------------------------------------------------------------------------------------------------------------------------------------------------------------------------------------------------------------------------------------------------------------------------------------------------------------------------------------------------------------------------------------------------------------------------------------------------------|
| <b>Title and abstract</b>    | 1       | (a) Indicate the study's design with a commonly used term in the title or the abstract<br><a href="#">Page 1</a><br>(b) Provide in the abstract an informative and balanced summary of what was done and what was found<br><a href="#">Page 1</a>                                                                                                                                                                                                                                                                                                                                                                                                                                                                                          |
| <b>Introduction</b>          |         |                                                                                                                                                                                                                                                                                                                                                                                                                                                                                                                                                                                                                                                                                                                                            |
| Background/rationale         | 2       | Explain the scientific background and rationale for the investigation being reported<br><a href="#">Page 2-4</a>                                                                                                                                                                                                                                                                                                                                                                                                                                                                                                                                                                                                                           |
| Objectives                   | 3       | State specific objectives, including any prespecified hypotheses<br><a href="#">Page 4</a>                                                                                                                                                                                                                                                                                                                                                                                                                                                                                                                                                                                                                                                 |
| <b>Methods</b>               |         |                                                                                                                                                                                                                                                                                                                                                                                                                                                                                                                                                                                                                                                                                                                                            |
| Study design                 | 4       | Present key elements of study design early in the paper<br><a href="#">Page 4-5</a>                                                                                                                                                                                                                                                                                                                                                                                                                                                                                                                                                                                                                                                        |
| Setting                      | 5       | Describe the setting, locations, and relevant dates, including periods of recruitment, exposure, follow-up, and data collection<br><a href="#">Page 4-6</a>                                                                                                                                                                                                                                                                                                                                                                                                                                                                                                                                                                                |
| Participants                 | 6       | (a) <i>Cohort study</i> —Give the eligibility criteria, and the sources and methods of selection of participants. Describe methods of follow-up<br>NA.<br><i>Case-control study</i> —Give the eligibility criteria, and the sources and methods of case ascertainment and control selection. Give the rationale for the choice of cases and controls<br>NA.<br><i>Cross-sectional study</i> —Give the eligibility criteria, and the sources and methods of selection of participants<br><a href="#">Page 4-5</a><br>(b) <i>Cohort study</i> —For matched studies, give matching criteria and number of exposed and unexposed<br><i>Case-control study</i> —For matched studies, give matching criteria and the number of controls per case |
| Variables                    | 7       | Clearly define all outcomes, exposures, predictors, potential confounders, and effect modifiers. Give diagnostic criteria, if applicable<br><a href="#">Page 6-8</a>                                                                                                                                                                                                                                                                                                                                                                                                                                                                                                                                                                       |
| Data sources/<br>measurement | 8*      | For each variable of interest, give sources of data and details of methods of assessment (measurement). Describe comparability of assessment methods if there is more than one group<br><a href="#">Page 6-8</a>                                                                                                                                                                                                                                                                                                                                                                                                                                                                                                                           |
| Bias                         | 9       | Describe any efforts to address potential sources of bias<br><a href="#">Page 5-6</a>                                                                                                                                                                                                                                                                                                                                                                                                                                                                                                                                                                                                                                                      |
| Study size                   | 10      | Explain how the study size was arrived at<br><a href="#">Page 4-5</a>                                                                                                                                                                                                                                                                                                                                                                                                                                                                                                                                                                                                                                                                      |
| Quantitative variables       | 11      | Explain how quantitative variables were handled in the analyses. If applicable, describe which groupings were chosen and why                                                                                                                                                                                                                                                                                                                                                                                                                                                                                                                                                                                                               |

|    |                     |    |                                                                                            |
|----|---------------------|----|--------------------------------------------------------------------------------------------|
| 1  |                     |    |                                                                                            |
| 2  |                     |    | <a href="#">Page 7-8</a>                                                                   |
| 3  | Statistical methods | 12 | (a) Describe all statistical methods, including those used to control for confounding      |
| 4  |                     |    | <a href="#">Page 8-9</a>                                                                   |
| 5  |                     |    | (b) Describe any methods used to examine subgroups and interactions                        |
| 6  |                     |    | NA.                                                                                        |
| 7  |                     |    | (c) Explain how missing data were addressed                                                |
| 8  |                     |    | <a href="#">Page 8-9</a>                                                                   |
| 9  |                     |    | (d) <i>Cohort study</i> —If applicable, explain how loss to follow-up was addressed        |
| 10 |                     |    | <i>Case-control study</i> —If applicable, explain how matching of cases and controls was   |
| 11 |                     |    | addressed                                                                                  |
| 12 |                     |    | <i>Cross-sectional study</i> —If applicable, describe analytical methods taking account of |
| 13 |                     |    | sampling strategy                                                                          |
| 14 |                     |    | <a href="#">Page 8</a>                                                                     |
| 15 |                     |    | (e) Describe any sensitivity analyses                                                      |
| 16 |                     |    | NA.                                                                                        |

Continued on next page

**Results**

|                   |     |                                                                                                                                                                                                                                                                                                                                                                                                                                                                                           |
|-------------------|-----|-------------------------------------------------------------------------------------------------------------------------------------------------------------------------------------------------------------------------------------------------------------------------------------------------------------------------------------------------------------------------------------------------------------------------------------------------------------------------------------------|
| Participants      | 13* | (a) Report numbers of individuals at each stage of study—eg numbers potentially eligible, examined for eligibility, confirmed eligible, included in the study, completing follow-up, and analysed<br><a href="#">Page 9</a><br>(b) Give reasons for non-participation at each stage<br><a href="#">NA.</a><br>(c) Consider use of a flow diagram<br><a href="#">NA.</a>                                                                                                                   |
| Descriptive data  | 14* | (a) Give characteristics of study participants (eg demographic, clinical, social) and information on exposures and potential confounders<br><a href="#">Page 9-10</a><br>(b) Indicate number of participants with missing data for each variable of interest<br><a href="#">NA.</a><br>(c) <i>Cohort study</i> —Summarise follow-up time (eg, average and total amount)<br><a href="#">NA.</a>                                                                                            |
| Outcome data      | 15* | <i>Cohort study</i> —Report numbers of outcome events or summary measures over time<br><a href="#">NA.</a><br><i>Case-control study</i> —Report numbers in each exposure category, or summary measures of exposure<br><a href="#">NA.</a><br><i>Cross-sectional study</i> —Report numbers of outcome events or summary measures<br><a href="#">Page 9-10</a>                                                                                                                              |
| Main results      | 16  | (a) Give unadjusted estimates and, if applicable, confounder-adjusted estimates and their precision (eg, 95% confidence interval). Make clear which confounders were adjusted for and why they were included<br><a href="#">Page 10-11</a><br>(b) Report category boundaries when continuous variables were categorized<br><a href="#">NA.</a><br>(c) If relevant, consider translating estimates of relative risk into absolute risk for a meaningful time period<br><a href="#">NA.</a> |
| Other analyses    | 17  | Report other analyses done—eg analyses of subgroups and interactions, and sensitivity analyses<br><a href="#">NA.</a>                                                                                                                                                                                                                                                                                                                                                                     |
| <b>Discussion</b> |     |                                                                                                                                                                                                                                                                                                                                                                                                                                                                                           |
| Key results       | 18  | Summarise key results with reference to study objectives<br><a href="#">Page 11</a>                                                                                                                                                                                                                                                                                                                                                                                                       |
| Limitations       | 19  | Discuss limitations of the study, taking into account sources of potential bias or imprecision. Discuss both direction and magnitude of any potential bias<br><a href="#">Page 16-17</a>                                                                                                                                                                                                                                                                                                  |
| Interpretation    | 20  | Give a cautious overall interpretation of results considering objectives, limitations, multiplicity of analyses, results from similar studies, and other relevant evidence<br><a href="#">Page 11-15</a>                                                                                                                                                                                                                                                                                  |
| Generalisability  | 21  | Discuss the generalisability (external validity) of the study results<br><a href="#">Page 14-16</a>                                                                                                                                                                                                                                                                                                                                                                                       |



**Other information**

---

Funding 22 Give the source of funding and the role of the funders for the present study and, if applicable, for the original study on which the present article is based

[Page 2](#)

\*Give information separately for cases and controls in case-control studies and, if applicable, for exposed and unexposed groups in cohort and cross-sectional studies.

**Note:** An Explanation and Elaboration article discusses each checklist item and gives methodological background and published examples of transparent reporting. The STROBE checklist is best used in conjunction with this article (freely available on the Web sites of PLoS Medicine at <http://www.plosmedicine.org/>, Annals of Internal Medicine at <http://www.annals.org/>, and Epidemiology at <http://www.epidem.com/>). Information on the STROBE Initiative is available at [www.strobe-statement.org](http://www.strobe-statement.org).
